RESEARCH ARTICLE

# An Alpha-1A Adrenergic Receptor Agonist Prevents Acute Doxorubicin Cardiomyopathy in Male Mice

Megan D. Montgomery<sup>1,2</sup>, Trevor Chan<sup>1,2\*</sup>, Philip M. Swigart<sup>1,2</sup>, Bat-erdene Myagmar<sup>1,2</sup>, Rajesh Dash<sup>1,2\*</sup>, Paul C. Simpson<sup>1,2\*</sup>

**1** Department of Medicine, Cardiology Division, VA Medical Center, San Francisco, CA, United States of America, **2** Department of Medicine and Cardiovascular Research Institute, University of California, San Francisco, San Francisco, CA, United States of America

✉ Current address: Stanford University, Stanford, CA, United States of America

\* [paul.simpson@ucsf.edu](mailto:paul.simpson@ucsf.edu)

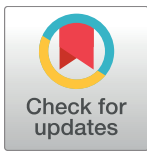

**OPEN ACCESS**

**Citation:** Montgomery MD, Chan T, Swigart PM, Myagmar B-e, Dash R, Simpson PC (2017) An Alpha-1A Adrenergic Receptor Agonist Prevents Acute Doxorubicin Cardiomyopathy in Male Mice. PLoS ONE 12(1): e0168409. doi:10.1371/journal.pone.0168409

**Editor:** Rakesh Kukreja, Virginia Commonwealth University Medical Center, UNITED STATES

**Received:** August 9, 2016

**Accepted:** November 29, 2016

**Published:** January 12, 2017

**Copyright:** This is an open access article, free of all copyright, and may be freely reproduced, distributed, transmitted, modified, built upon, or otherwise used by anyone for any lawful purpose. The work is made available under the [Creative Commons CC0](https://creativecommons.org/licenses/by/4.0/) public domain dedication.

**Data Availability Statement:** All relevant data are within the paper.

**Funding:** This work was supported by National Institutes of Health (PCS, HL31113), the Department of Veterans Affairs (PCS, BX001970), the Western States Affiliate of the American Heart Association (RD), the Sarnoff Foundation for Cardiovascular Research (TC), and the PhRMA Foundation (MDM). The funders had no role in study design, data collection and analysis, decision to publish, or preparation of the manuscript.

## Abstract

Alpha-1 adrenergic receptors mediate adaptive effects in the heart and cardiac myocytes, and a myocyte survival pathway involving the alpha-1A receptor subtype and ERK activation exists in vitro. However, data in vivo are limited. Here we tested A61603 (*N*-[5-(4,5-dihydro-1*H*-imidazol-2-yl)-2-hydroxy-5,6,7,8-tetrahydronaphthalen-1-yl]methanesulfonamide), a selective imidazoline agonist for the alpha-1A. A61603 was the most potent alpha-1-agonist in activating ERK in neonatal rat ventricular myocytes. A61603 activated ERK in adult mouse ventricular myocytes and protected the cells from death caused by the anthracycline doxorubicin. A low dose of A61603 (10 ng/kg/d) activated ERK in the mouse heart in vivo, but did not change blood pressure. In male mice, concurrent subcutaneous A61603 infusion at 10 ng/kg/d for 7 days after a single intraperitoneal dose of doxorubicin (25 mg/kg) increased survival, improved cardiac function, heart rate, and cardiac output by echocardiography, and reduced cardiac cell necrosis and apoptosis and myocardial fibrosis. All protective effects were lost in alpha-1A-knockout mice. In female mice, doxorubicin at doses higher than in males (35–40 mg/kg) caused less cardiac toxicity than in males. We conclude that the alpha-1A-selective agonist A61603, via the alpha-1A adrenergic receptor, prevents doxorubicin cardiomyopathy in male mice, supporting the theory that alpha-1A adrenergic receptor agonists have potential as novel heart failure therapies.

## Introduction

Cardiac myocyte alpha-1 adrenergic receptors ( $\alpha$ 1-ARs) mediate crucial adaptive functions in the heart, including physiological hypertrophy, contractility, survival signaling, ischemic preconditioning, and protection against multiple injuries, by activating multifactorial signaling cascades, as reviewed [1,2,3]. Among the 3  $\alpha$ 1-AR subtypes ( $\alpha$ 1A,  $\alpha$ 1B, and  $\alpha$ 1D), rodent and human myocytes have the  $\alpha$ 1A and  $\alpha$ 1B [4], and most data implicate the  $\alpha$ 1A in adaptive effects [5,6,7,8,9,10,11]. However, it is unknown if an  $\alpha$ 1A-AR agonist can treat cardiomyopathy in vivo.

**Competing Interests:** UCSF owns a patent with PCS as inventor for use of A61603 in heart failure, and PCS is involved in a company to pursue this. The indicated patent owned by UCSF is "Method of treatment using alpha-1-adrenergic agonist compounds" (inventor Paul C. Simpson) (allowed #8324178, 2009). This patent has not resulted in any company, product, employment, etc. This does not alter our adherence to PLOS ONE policies on sharing data and materials.

A61603 (*N*-[5-(4,5-dihydro-1*H*-imidazol-2-yl)-2-hydroxy-5,6,7,8-tetrahydronaphthalen-1-yl]methanesulfonamide), is a potent and selective imidazoline agonist for the  $\alpha$ 1A [12]. Selectivity for the  $\alpha$ 1A is important for potential clinical use, since the  $\alpha$ 1D might cause constriction of human epicardial coronary arteries [13], and the role of the  $\alpha$ 1B remains uncertain.

The anthracycline doxorubicin (DOX, Adriamycin) is a highly effective, widely used treatment for many pediatric and adult cancers, but has the severe, dose-limiting adverse effect of cardiotoxicity [14]. Previously, we found that adenoviral expression of the  $\alpha$ 1A receptor in myocytes from the  $\alpha$ 1-AR knockout (KO) reduced necrosis and apoptosis after DOX in vitro, through an ERK signaling mechanism [8], and that A61603 prevented DOX-induced apoptosis in vivo, detected by an MRI approach [9].

Here we first verified the potency of A61603 in myocyte ERK activation and protection from DOX in vitro. We identified a very low A61603 dose, 10 ng/kg/d, which activated cardiac ERK in vivo but did not increase blood pressure (BP), the classic role of  $\alpha$ 1-ARs [15]. Using this low dose, we tested the hypothesis that the beneficial effects of  $\alpha$ 1A stimulation with A61603 would translate to treatment of anthracycline cardiomyopathy in a mouse model in vivo.

We find that A61603 can prevent DOX cardiomyopathy in male mice, that this effect requires the  $\alpha$ 1A receptor, and that mechanisms include less cell death and fibrosis. We also observe that female mice are less susceptible to DOX cardiotoxicity, contrary to female humans, who are said to be more susceptible to anthracyclines [16,17]. The data support the idea that  $\alpha$ 1A agonists might translate to new therapy for heart failure (HF).

## Materials and Methods

### Animals

Female Sprague-Dawley rats with newborn litters were from Charles River; litters were used on arrival, and mothers were euthanized. Adult C57Bl/6J male and female mice age 14–18 weeks were from Jackson Laboratory, or our laboratory where wild type (WT) and  $\alpha$ 1A-AR knockout (KO) mice were produced [15]. All studies were reviewed and approved by the IACUC of the San Francisco VA Medical Center. Our institution is accredited by the American Association for the Accreditation of Laboratory Animal Care and has an Animal Welfare Assurance on file with the NIH Office for Laboratory Animal Research. Mice were housed in groups in sterile micro-isolator cages with food and water available ad libitum. Chow was Envigo Harlan Teklad, 2019 for breeders and 2016 for other mice. Light was on a 12 h schedule, temperature was 68–79°F, and humidity was 30–70%. Animals were inspected daily, and a licensed veterinarian was available at all times. Euthanasia was by cardiectomy under deep anesthesia with isoflurane. Criteria for euthanasia were signs of distress, including inactivity, poor grooming, hunched posture, weight loss >20% body weight (BW), or if heart rate (HR) was less than 200 bpm. For osmotic minipump and telemeter implantation, anesthesia was with isoflurane 1.5–3% in oxygen, and analgesia was with local bupivacaine 0.25% and systemic buprenorphine 5–100  $\mu$ g/kg s.c.

### Drugs

Drugs were as follows: A61603 (*N*-[5-(4,5-dihydro-1*H*-imidazol-2-yl)-2-hydroxy-5,6,7,8-tetrahydronaphthalen-1-yl]methanesulfonamide hydrobromide) (Tocris #1052); ABT-866 (*N*-[3-(1*H*-imidazol-4-ylmethyl)phenyl]ethanesulfonamide) (synthesized by Synterys, Union City, CA); cirazoline (Tocris now R&D # 0888); dobutamine (Fisher Scientific, ICN#15978010); doxorubicin (Tocris #2252); epinephrine (Sigma #E4375); methoxamine (Sigma #M6524); midodrine (MP-Bio #155717); norepinephrine (Sigma #N5785); oxymetazoline (Tocris

#1142); phenylephrine (Sigma #P-6126); propranolol (Fluka #82066); and ST-1059 (Toronto Research Chemicals #S686650).

### Neonatal rat ventricular myocyte isolation and culture

Neonatal rat ventricular myocytes (NRVMs) were isolated with trypsin digestion and mechanical dissociation, preplated to remove contaminating non-myocardial cells, and counted, with a yield of viable myocytes (excluding trypan blue) of approximately 3.5–4 million per neonatal heart. Cells at 500 per mm<sup>2</sup> were plated overnight in 35 mm dishes in MEM with 5% calf serum and bromodeoxyuridine (BrdU), then maintained at 37°C with 1% CO<sub>2</sub>, in serum-free MEM with Hank's salts, supplemented with penicillin, vitamin B12, BrdU, human transferrin 10 µg/ml, bovine insulin 10 µg/ml, and BSA 1 mg/ml [18,19]. Plating efficiency was approximately 25–30% of viable myocytes plated.

### Adult mouse ventricular myocyte isolation and culture

Adult mouse ventricular myocytes (AMVMs) were isolated following a detailed protocol [20]. Briefly, hearts were removed from WT and  $\alpha$ 1A-KO adult male mice under deep anesthesia with isoflurane, after heparin 100 IU in PBS i.p. to prevent coagulation of blood in the coronary arteries. Myocytes were obtained by perfusion with collagenase in nominally calcium-free buffer with butanedione monoxime (BDM) 10 mM, followed by mechanical dissociation and gradual calcium reintroduction, with a yield of 1–2 million cells per heart. Sixty thousand rod-shaped myocytes were plated onto laminin-coated 35 mm dishes in Minimal Essential Medium (MEM) with Hank's salts, supplemented with calf serum 10%, BDM 10 mM, and penicillin 100 U/ml. After 2 h for myocyte attachment, cells were maintained in serum free MEM with Hank's salts, supplemented with BSA 1 mg/ml and penicillin at 37°C with 2% CO<sub>2</sub>.

### ERK activation

For ERK activation (phosphorylation), NRVMs or AMVMs after 1 day in culture were pre-treated 10 min with propranolol (PROP) 200 nM, then treated 5 min with A61603 or vehicle at 37°C, 2% CO<sub>2</sub>. Ventricular myocardium was collected after 7 d infusion in vivo with A61603 or vehicle. Samples were lysed in 1.5X SDS sample buffer containing Complete Mini protease and phosphatase inhibitor cocktails 2 and 3, snap-frozen, and stored at -80°C. For immunoblot, samples in SDS sample buffer were boiled for 5 min at 100°C; equal numbers of cells (25,000 NRVMs, 12,000 AMVMs) or equal amounts of ventricular protein (Bradford, 20 µg) per lane were separated on 12.5% Criterion Tris-HCl SDS-PAGE gels; and proteins were transferred to nitrocellulose membranes. Membranes were blocked with non-fat milk 5% in TBS-T, then incubated overnight at 4°C with 1:1,000 primary antibody in BSA-Tween 5%. Antibodies were total ERK1/2 (Cell Signaling #9102) and phospho-ERK1/2 (Cell Signaling #4370, phospho Thr202/Tyr204-p44/42 MAPK, D12.14.4E, XP® Rabbit mAb). Secondary antibody in milk 5% in TBS-T (anti-rabbit IgG, HRP-linked antibody, Cell Signaling #7074) was incubated 1 h at RT, and bands were developed using SuperSignal West Dura ECL reagent (Thermo Scientific #34076). Images were captured with the ChemiDoc XRS system (Bio-Rad), and analyzed with QuantityOne software version 4.6.9 (Bio-Rad).

### Toxicity assay in AMVMs

For toxicity assay, AMVMs the day after isolation were pre-treated 10 min with A61603 or vehicle, and PROP 200 nM, then DOX 20 µM or MEM vehicle. The next day cells were assayed using the MTT CellTiter Proliferation Assay protocol (ATCC #30-1010K), and absorbance of

the purple formazan product indicating viable mitochondrial dehydrogenase activity was measured in triplicate aliquots at 570 nm on a GloMax-Multi+ Microplate reader (Promega). Blank wells were media plus MTT and Detergent Reagents, without cells.

### Drug delivery in vivo

Alzet osmotic mini-pumps (Durect) were used for continuous, subcutaneous (s.c.) drug delivery in vivo. Pump model #1002 has a mean pumping rate 0.25  $\mu\text{l}$  per hour, and a maximum duration 14 days. Pumps were filled as stated by the package instructions; mice were anesthetized with isoflurane; and pumps were implanted s.c. between the scapulae.

### Blood pressure (BP) by telemetry

Telemetry BP was measured in awake, unrestrained 12 w male mice using PA-C10 BP transmitters (Data Sciences International, DSI). Under anesthesia with isoflurane (induction 3% in oxygen 100%, maintenance 1.5%), the pressure-sensing catheter was positioned in the aortic arch via the left carotid artery, and the transmitter body was placed s.c. along the left flank. Mice were recovered 7 d before an experiment. The Acquisition and Analysis programs of the Dataquest ART software (DSI) were used to collect and analyze BP data. For BP with continuous s.c. dosing, mice were housed throughout in the same room. BP was acquired with either 24 h continuous recording (12 h rest 6 am to 6 pm; 12 h activity 6 pm to 6 am), or twice-daily sessions during periods of rest (2 to 3 pm) or activity (12 to 1 am). Baseline BP was established over 4 d, after which pumps were implanted with A61603 (10 ng/kg/d or 10  $\mu\text{g}/\text{kg}/\text{d}$ ), NE (2.5 mg/kg/d), or vehicle (vitamin C 100  $\mu\text{M}$  in 0.9% NaCl). After pump implantation, BP measurements began immediately for the 24 h continuous recording, or the following d for the twice-daily recordings, for a total of 7 d. BP parameters were averaged, and compared with baseline values.

### Echocardiography (echo)

Conscious, gently restrained mice underwent echo using an Acuson S2000 (Siemens) with a 5-14-MHz multi-dimension matrix transducer [21]. Ventricular dimensions were captured using 2-dimensional M-mode, with measurements taken at the mid-left ventricle (LV), just distal to the mitral valve leaflet plane, and acquired from five consecutive cardiac cycles in the long axis view. The echocardiographer was blinded to the genotype and treatments of all mice. Fractional shortening (FS), cardiac output (CO), stroke volume (SV), and ventricular volumes were calculated as follows [22]:

$$\text{FS (\%)} = [(LVIDd - LVIDs) / LVIDd] \times 100$$

$$\text{CO (ml/min)} = (SV \times \text{HR}) / 1000$$

$$\text{SV (\mu l)} = LVEDV - LVESV$$

$$\text{LVEDV (\mu l)} = [7 / (2.4 + LVIDd)] \times LVIDd^3$$

$$\text{LVESV (\mu l)} = [7 / (2.4 + LVIDs)] \times LVIDs^3$$

Where LVIDd, LV internal diameter in diastole; LVIDs, LV internal diameter in systole; HR, heart rate (from echo); LVEDV, LV end diastolic volume; LVESV, LV end systolic volume.

### Acute doxorubicin (DOX)-induced cardiomyopathy

Mice were given DOX in 250  $\mu\text{l}$  saline vehicle intraperitoneal (i.p.), males 25 mg/kg or females 15–40 mg/kg. Prior to DOX, picking numbers randomized males to continuous s.c. dosing with A61603 10 ng/kg/d or vehicle (100  $\mu\text{M}$  vitamin C) by osmotic mini-pump, with a ratio in

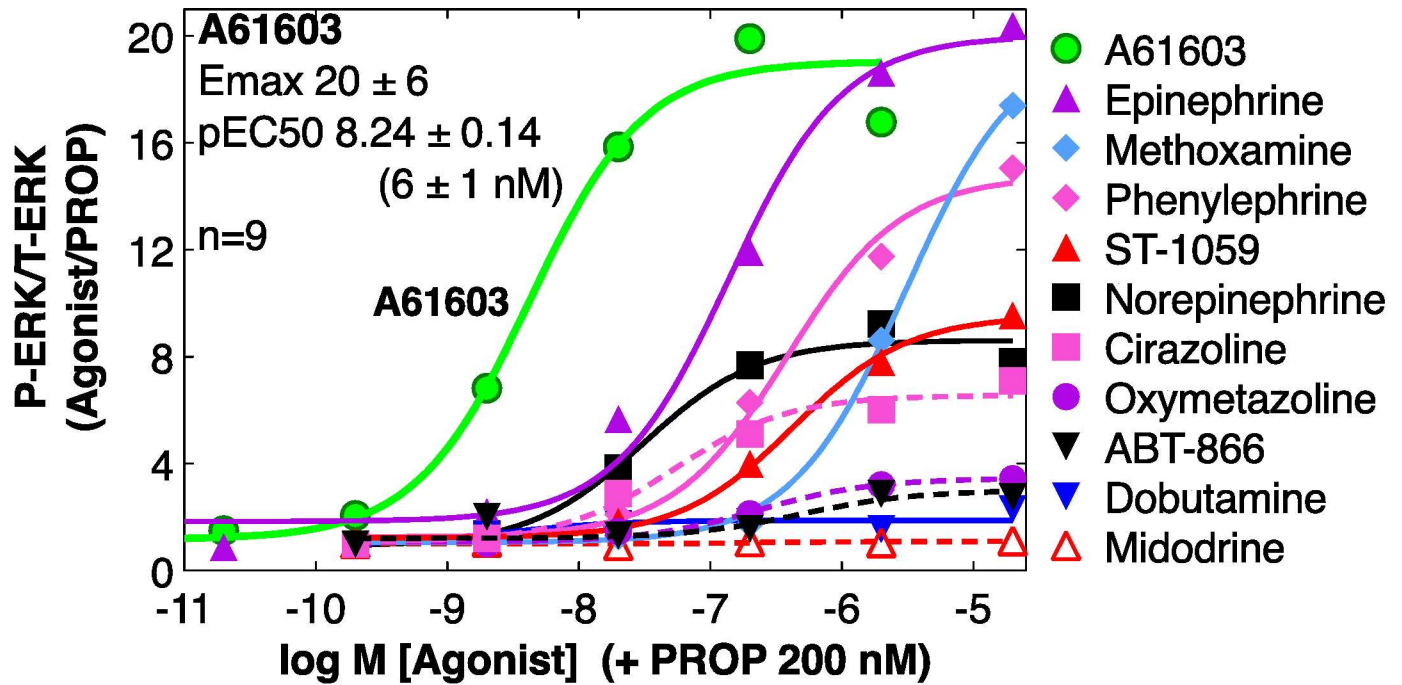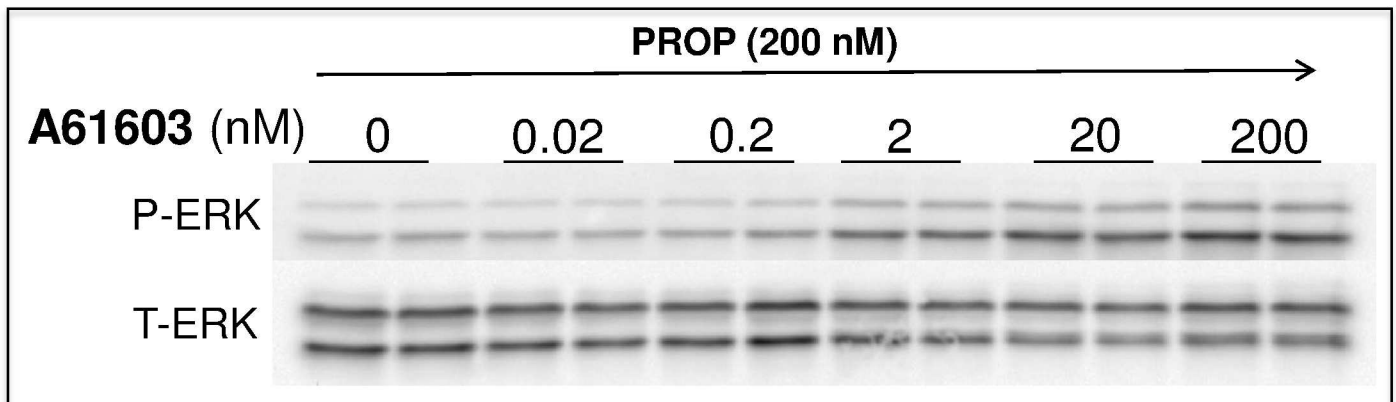

**Fig 1. A61603 potently activates ERK in cultured neonatal rat ventricular myocytes (NRVMs).** ERK activation was quantified by immunoblot as the ratio of phospho- to total-ERK (P-ERK/T-ERK) after 10 min with the beta-blocker propranolol (PROP) 200 nM, then 5 min with various  $\alpha$ 1-agonists or vehicle. Dose-response curves normalized to vehicle+PROP were analyzed by non-linear regression (N = 3–8 independent cultures, each dose in duplicate in each experiment). A61603 blots are shown. Table 1 has Emax and EC50 for each agonist.

doi:10.1371/journal.pone.0168409.g001

WT mice of 2 vehicle to 1 A61603. Pumps were filled with drug or vehicle and coded by an independent person, and the code was not broken until the end of the experiment, so that all operators were blinded. Mice were monitored daily, and sacrificed at 7 days, or earlier if there were signs of distress, including inactivity, poor grooming, hunched posture, weight loss >20% BW, or if HR



**Table 1. Alpha-1-AR agonist ERK potency, binding affinity, and subtype selectivity.**

|                   | ERK Activation in NRVMs |                  |   | Alpha-1-AR Binding Affinity (pKi) |                  |                  | Binding Selectivity |      |      |
|-------------------|-------------------------|------------------|---|-----------------------------------|------------------|------------------|---------------------|------|------|
|                   | pEC50                   | E <sub>max</sub> | n | Alpha-1A                          | Alpha-1B         | Alpha-1D         | A/B                 | A/D  | B/D  |
| A61603            | 8.24 ± 0.14             | 20.5 ± 6.1       | 9 | 7.74 ± 0.11 (7)                   | 5.68 ± 0.08 (5)  | 5.85 ± 0.01 (5)  | 115                 | 78   | 0.7  |
| Dobutamine        | 7.65 ± 0.28             | 2.8 ± 0.7        | 5 | 7.00 (1)                          | na               | Na               | 0.4                 | 0.1  | 0.2  |
| Norepinephrine    | 7.57 ± 0.11             | 8.6 ± 1.3        | 7 | 5.45 ± 0.18 (17)                  | 5.67 ± 0.13 (19) | 6.83 ± 0.16 (13) | 0.6                 | 0.04 | 0.07 |
| Cirazoline        | 7.25 ± 0.12             | 6.6 ± 0.1        | 3 | 6.79 ± 0.14 (5)                   | 6.40 ± 0.17 (4)  | 6.94 ± 0.27 (4)  | 2.5                 | 0.7  | 0.3  |
| Epinephrine       | 7.16 ± 0.12             | 19.6 ± 5.9       | 6 | 5.45 ± 0.14 (13)                  | 5.82 ± 0.15 (15) | 6.44 ± 0.10 (11) | 0.4                 | 0.1  | 0.2  |
| ABT-866           | 6.71 ± 0.32             | 2.9 ± 0.7        | 3 | 6.84 ± 0.02 (3)                   | 6.06 ± 0.003 (3) | 6.55 ± 0.003 (3) | 6.1                 | 1.9  | 0.3  |
| Oxymetazoline     | 6.63 ± 0.09             | 3.5 ± 0.1        | 3 | 7.69 ± 0.09 (20)                  | 6.62 ± 0.05 (21) | 6.07 ± 0.08 (15) | 12                  | 42   | 3.5  |
| Phenylephrine     | 6.42 ± 0.11             | 15.0 ± 5.2       | 5 | 5.36 ± 0.17 (14)                  | 5.28 ± 0.14 (14) | 6.24 ± 0.16 (10) | 1.2                 | 0.1  | 0.1  |
| Midodrine/ST-1059 | 6.40 ± 0.05             | 9.7 ± 1.1        | 3 | 5.63 ± 0.21 (4)                   | 5.14 ± 0.04 (4)  | 5.60 ± 0.18 (4)  | 3.1                 | 1.1  | 0.3  |
| Methoxamine       | 5.54 ± 0.04             | 20.0 ± 6.9       | 4 | 4.52 ± 0.18 (14)                  | 3.54 ± 0.17 (15) | 4.65 ± 0.15 (10) | 9.4                 | 0.7  | 0.1  |

Dose-response curves for 10 alpha-1-agonists, in duplicate dishes for each dose in each experiment (n), were generated for ERK activation (5 min agonist treatment), in the presence of the beta-blocker propranolol 200 nM.

Potency (pEC50) and efficacy (E<sub>max</sub>) for each experiment were from non-linear regression analysis.

Binding affinity (pKi) for each agonist at recombinant alpha-1-AR subtypes is from the literature (n = reports).

The agonist selectivity for each alpha-1-receptor subtype was calculated as A/B = (10<sup>4</sup>(pKi A—pKi B)), and similarly for A/D and B/D.

For midodrine/ST-1059, functional data are reported for the active compound ST-1059; and binding data are for the parent compound midodrine.

Values are mean ± SE.

na = not available.

Agonists are ordered according to the ERK pEC50.

doi:10.1371/journal.pone.0168409.t001

was less than 200 bpm, a sign of severe cardiomyopathy. Echocardiograms (echos) were done at baseline in some mice, and in all mice on the day of sacrifice. At sacrifice, BW was recorded, blood was collected, and organs and tibia were harvested.

### Blood analysis for cardiomyocyte death

Blood was collected by left ventricle (LV) apical puncture with a 20-gauge needle. Whole blood was allowed to clot, centrifuged at 13,000 rpm for 10 min, and the serum supernatant was snap-frozen, and stored at -80°C. Creatine kinase (CK) activity was measured in non-hemolyzed serum samples using the CK UV-rate kit (Stanbio Labs).

### Heart histology for apoptosis and fibrosis

Hearts were perfused in situ via the LV apex with KCl 60 mM to arrest in diastole, and fixed by paraformaldehyde 4%. After paraffin embedding, 6 μm sections were cut from LV base to apex every 100 μm, with an average of 5 sections per step collected per heart.

Sections were stained for fibrosis using the Picosirius Red Stain kit (Polysciences, Inc.) and for apoptosis using the APO-BrdU™ TUNEL Assay Kit (Molecular Probes/Invitrogen). Random fields of the LV myocardium were imaged under phase microscopy at 40x magnification using a SPOT Imaging Solutions camera and software. Images were analyzed with ImageJ.

### Data analysis

Results are presented as mean ± SE. Significant differences (p<0.05) were tested using one-way ANOVA with Newman-Keuls multiple comparison test for more than two groups, or Student's unpaired t-test for two groups (GraphPad Prism v4.0c). Survival data were analyzed by

**A. ERK activation**

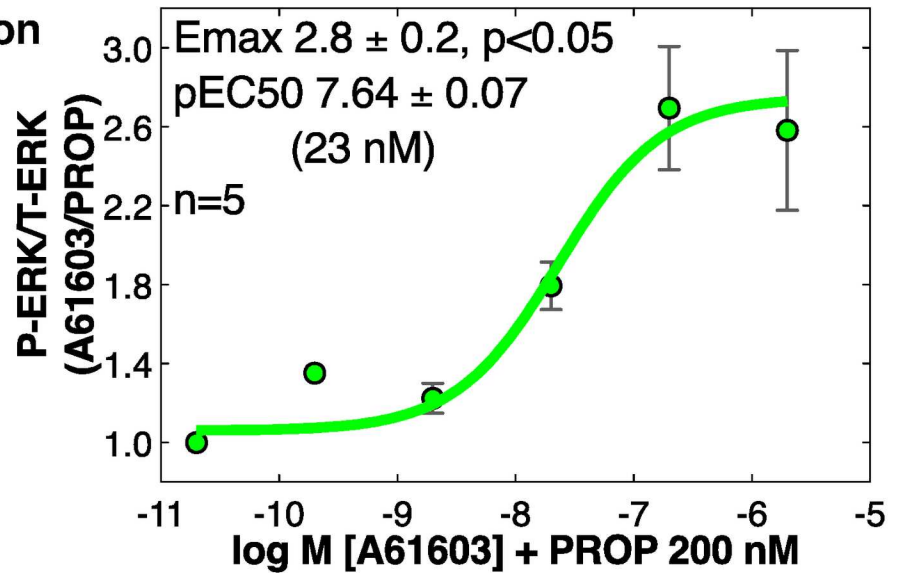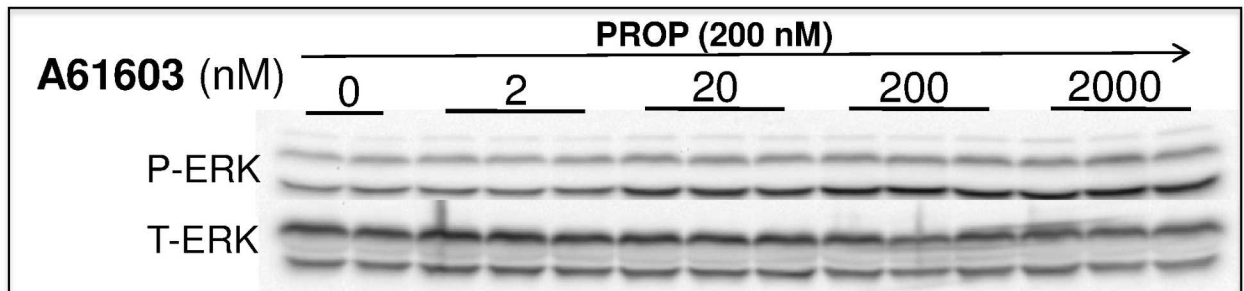

**B. Protection**

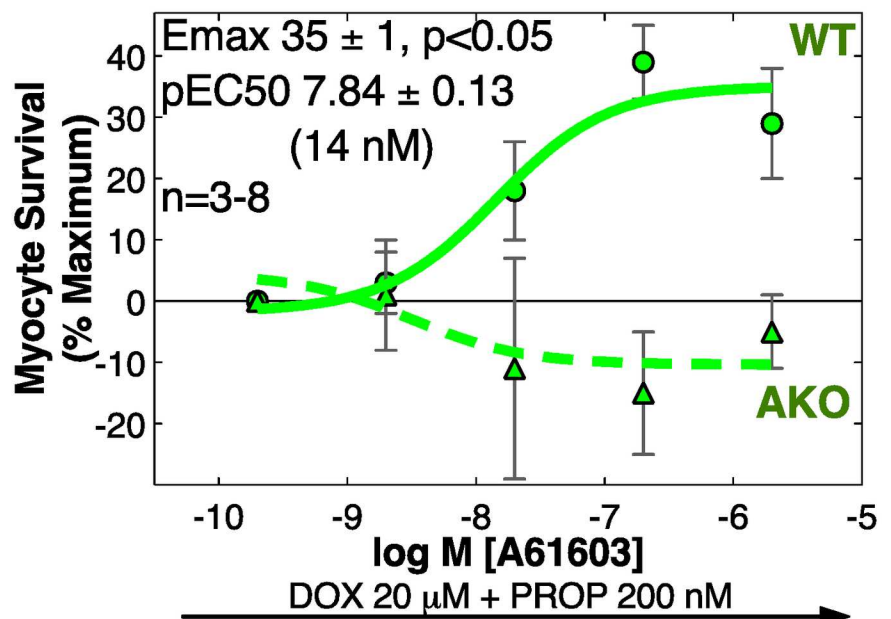

**Fig 2. A61603 activates ERK and protects WT adult mouse ventricular myocytes (AMVMs) from DOX toxicity in vitro, via the  $\alpha$ 1A.** (A) ERK activation in cultured AMVMs was quantified by immunoblot as the ratio of phospho- to total-ERK (P-ERK/T-ERK) after 10 min with the beta-blocker PROP 200 nM, then 5 min with A61603 or vehicle. Dose-response curves normalized to vehicle+PROP were analyzed by non-linear regression ( $n = 5$  cultures from separate hearts, each in duplicate; values are mean  $\pm$  SE). Emax is significantly different from 1.0 by 95% confidence limits ( $p < 0.05$ ). Representative blots are shown. (B) WT or  $\alpha$ 1A KO cultured AMVMs were treated

overnight with DOX 20  $\mu$ M and PROP 200 nM, in the presence of varying doses of A61603 or vehicle. Myocyte survival by MTT assay is shown as mean  $\pm$  SE, and was analyzed by non-linear regression and 2-way ANOVA, relative to PROP alone at 100% and DOX+PROP at 0%;  $n = 3-8$  cultures from separate hearts, each in duplicate or triplicate. WT pEC50 and Emax are shown. Emax is significantly different from 1.0 by 95% confidence limits ( $p < 0.05$ ).

doi:10.1371/journal.pone.0168409.g002

Kaplan-Meier curves. Normal distribution for continuous variables was confirmed using the D'Agostino and Pearson omnibus test.

## Results

### A61603 is the most potent $\alpha$ 1-agonist in ERK activation in myocytes

Previously, we defined an  $\alpha$ 1A-ERK survival pathway using adenoviral expression in  $\alpha$ 1-KO cardiac myocytes [8]. Here we tested 10  $\alpha$ 1-agonists for ERK activation in cultured NRVMs. The  $\beta$ -AR antagonist propranolol, which does not itself activate ERK (unpublished data), was present throughout, since some  $\alpha$ 1-agonists also activate  $\beta$ -ARs (e.g. norepinephrine, epinephrine, phenylephrine). **Fig 1** shows that A61603 was the most potent in ERK activation (EC50 6 nM), and was highly efficacious (20-fold increase). **Table 1** summarizes the pEC50 and Emax values for ERK activation, and also shows the binding affinities for each agonist at recombinant  $\alpha$ 1-subtypes, from the literature. The calculated binding selectivity for the  $\alpha$ 1A over the  $\alpha$ 1B or  $\alpha$ 1D shows that A61603 is the most selective of all agonists for the  $\alpha$ 1A (**Table 1**). These data confirmed that A61603 activated the  $\alpha$ 1A-ERK pathway with high potency and efficacy.

### A61603 activates ERK and protects adult cardiac myocytes from DOX in vitro, via the $\alpha$ 1A

In cultured adult mouse ventricular myocytes (AMVMs), A61603 activated ERK, and protected myocytes from DOX toxicity (**Fig 2**). The EC50 values for these 2 effects were very similar (23 and 14 nM, **Fig 2**). The lower potency and efficacy of A61603 in AMVM ERK activation in comparison with NRVMs (**Fig 1**) is consistent with the 10-fold lower density of  $\alpha$ 1A-ARs in AMVMs [2]. In  $\alpha$ 1A KO myocytes, A61603 did not prevent DOX toxicity, confirming that A61603 was working specifically at the  $\alpha$ 1A receptor on cardiac myocytes to confer a protective effect (**Fig 2B**). These data showed that A61603 activated the myocyte ERK survival pathway defined previously [8].

### A61603 activates cardiac ERK in vivo at subpressor dosing

We infused normal adult male WT C57Bl6J mice with A61603 (0.01 to 10  $\mu$ g/kg/d) by s.c. osmotic minipump, and quantified cardiac ERK activation by immunoblot after 7 d. A61603 increased ventricular phospho-ERK by 2.8-fold, with an EC50 9 ng/kg/d (**Fig 3A**). To measure BP in awake, unrestrained mice, we inserted telemetry catheters in the aorta and infused A61603 10 ng/kg/d or 10  $\mu$ g/kg/d or vehicle for 7 days, after 4 days baseline recording. From 24 h recording, we identified periods of maximum rest (2–3 PM) or activity (12–1 PM) for detailed analysis. A61603 had no effect of systolic or diastolic BP in resting or active mice (**Fig 3B**). Previously, we found that A61603 increases BP with an EC50 300 ng/kg given acutely intravenous [15], as expected for an  $\alpha$ 1-AR agonist [23]. Thus, A61603 activated cardiac ERK at dosing that was far below that required to increase BP.



**A. ERK activation**

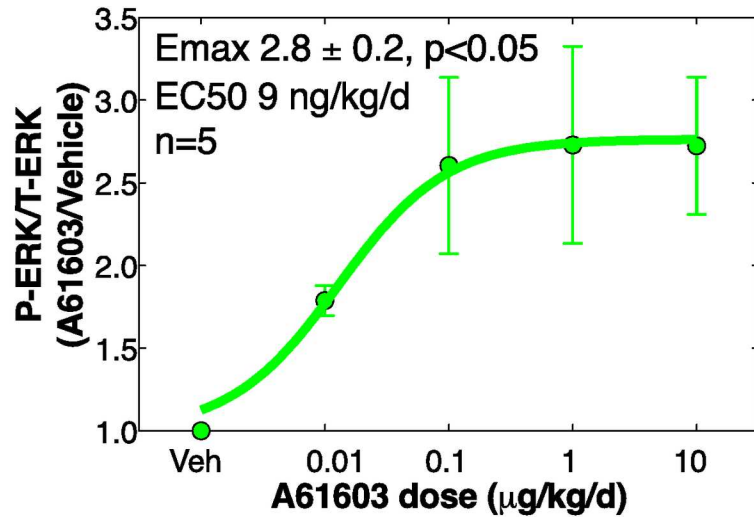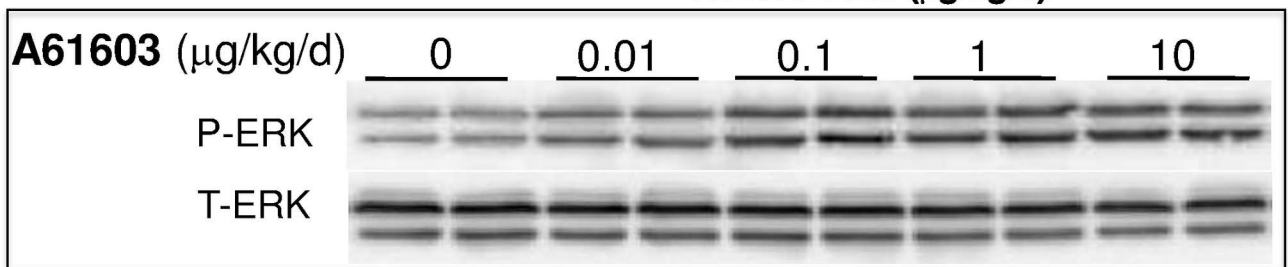

**B. BP by telemetry**

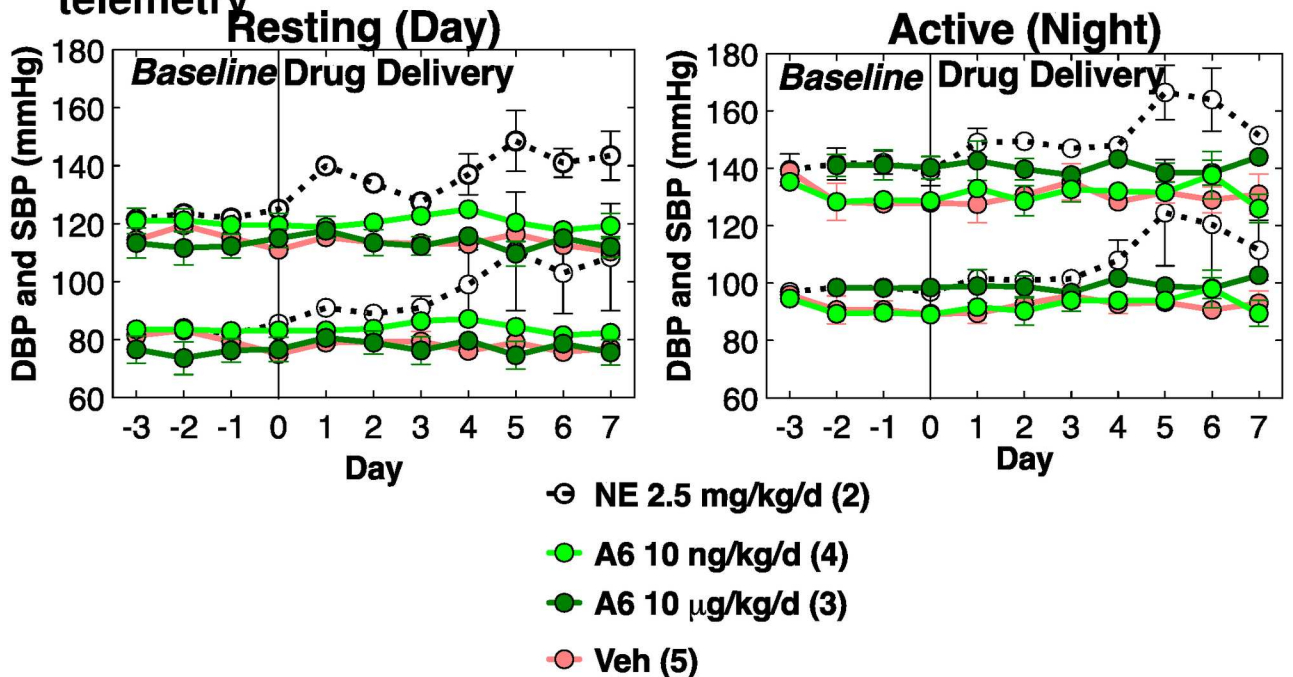

**Fig 3. A61603 activates ERK in vivo at subpressor dosing.** (A) Normal male WT mice age 10–12 w were treated with A61603 (0.01–10 µg/kg/d) or vehicle (100 µM vitamin C) continuously for 7 d via s.c. osmotic mini-pump, and cardiac ERK activation was quantified by immunoblot as the ratio of P-ERK/T-ERK. Results are for the cytosolic fraction of ventricular homogenates, which contained approximately 75% of total- and phospho-ERK. The A61603 dose-response curve was normalized to vehicle, and analyzed by non-linear regression (N = 5

mice per dose, mean  $\pm$  SE). Emax is significantly different from 1.0 by 95% confidence limits ( $p < 0.05$ ). A blot is shown below. **(B)** Baseline BP was recorded for 4 d, then A61603 (10 ng/kg/d and 10  $\mu$ g/kg/d) or vehicle were infused continuously for 7 d by osmotic pump. Systolic BP (upper traces) and diastolic BP (lower traces) are shown during **(left)** periods of rest (2–3 pm) and **(right)** periods of activity (12–1 am). Numbers of mice are indicated. A hypertensive dose of NE (2.5 mg/kg/d) was a positive control.

doi:10.1371/journal.pone.0168409.g003

## A61603 improves survival in an acute cardiotoxic DOX HF model

Among multiple models of DOX cardiotoxicity, acute high-dose models are used to test efficacy of potential therapies [24]. We did a trial in an acute, high-dose DOX model to test for beneficial effects of A61603 in vivo.

Young male mice were given DOX in a single dose, 25 mg/kg i.p. Seventy WT mice and 21  $\alpha$ 1A-KO mice were randomized to continuous s.c. infusion by osmotic mini-pump of A61603 or vehicle (100  $\mu$ M vitamin C). Immediately after pump implantation, mice were injected once with DOX. A61603 dosing was 10 ng/kg/d, which activates cardiac ERK but does not change BP (Fig 3). Echo was done at baseline in some mice, and then in all mice at euthanasia, when dictated by signs of distress or bradycardia, or at study end after 7 days, according to the protocol shown in Fig 4A. All operators were blinded to genotype and treatment.

In WT male mice after DOX, A61603 improved survival to day 7 to 84%, from 34% with vehicle ( $p < 0.0008$ ) (Fig 4B). In  $\alpha$ 1A-KO mice, A61603 did not improve survival after DOX, and mortality was 100% by day 6 regardless of treatment, worse than WT mice (Fig 4B). Therefore, the beneficial survival effect of the  $\alpha$ 1A-agonist A61603 during DOX cardiotoxicity required the  $\alpha$ 1A receptor, indicating an on-target effect.

## A61603 preserves cardiac function after acute high-dose DOX

We used FS by echo in awake mice to quantify LV function after DOX. Following DOX injection, FS fell in surviving vehicle-treated WT mice, from 58% pre-DOX to 49% at euthanasia for HF or at day 7 ( $n = 12$ ,  $p < 0.01$ ) (Fig 5, Table 2). A61603 prevented this decline in cardiac function in WT mice, with FS 61% post-DOX ( $n = 14$ ,  $p < 0.001$  vs. DOX+Veh) (Fig 5). In  $\alpha$ 1A KO mice, A61603 did not prevent the drop in FS (58% pre-DOX to 38% post-DOX) (Fig 5). It was not possible to do a terminal echo on all studied mice, since many died unexpectedly during the night.

To evaluate the A61603 mechanisms involved in preserving cardiac function measured by FS after DOX, LV dimensions were examined. LVIDd was markedly reduced after DOX in all mice (Table 2), consistent with cardiac atrophy, as seen in mice and humans with anthracycline cardiomyopathy [25,26,27]. Reduced heart weight at study end supported the conclusion of cardiac atrophy (below). WT mice treated with A61603 had trends toward a larger LVIDd, smaller LVIDs, and greater systolic thickness of the LV posterior wall (LVPWs) and interventricular septum (IVSs), all consistent with less atrophy and improved systolic function (Table 2). Most of these trends were absent in  $\alpha$ 1A KO mice (Table 2).

## A61603 preserves hemodynamics after acute high-dose DOX

Interestingly, HF in mice is associated with bradycardia. WT mice given vehicle with DOX had a 55% decrease in HR vs. Pre-DOX, whereas WT mice treated with A61603 had only a 23% decrease, a significant improvement vs. vehicle ( $p < 0.05$ , Table 2, Fig 6). A61603 did not preserve HR in  $\alpha$ 1A KO mice (Table 2, Fig 6). Similarly, SV, the amount of blood ejected with each beat, was reduced by 50% vs. Pre-DOX in WT mice given vehicle with DOX, whereas the drop in SV with DOX was only 33% with A61603 treatment ( $p < 0.05$  vs. vehicle). The improved SV with A61603 was lost in  $\alpha$ 1A KO mice (Table 2, Fig 6). Together, the reduced HR and SV

### A. Acute DOX cardiomyopathy model

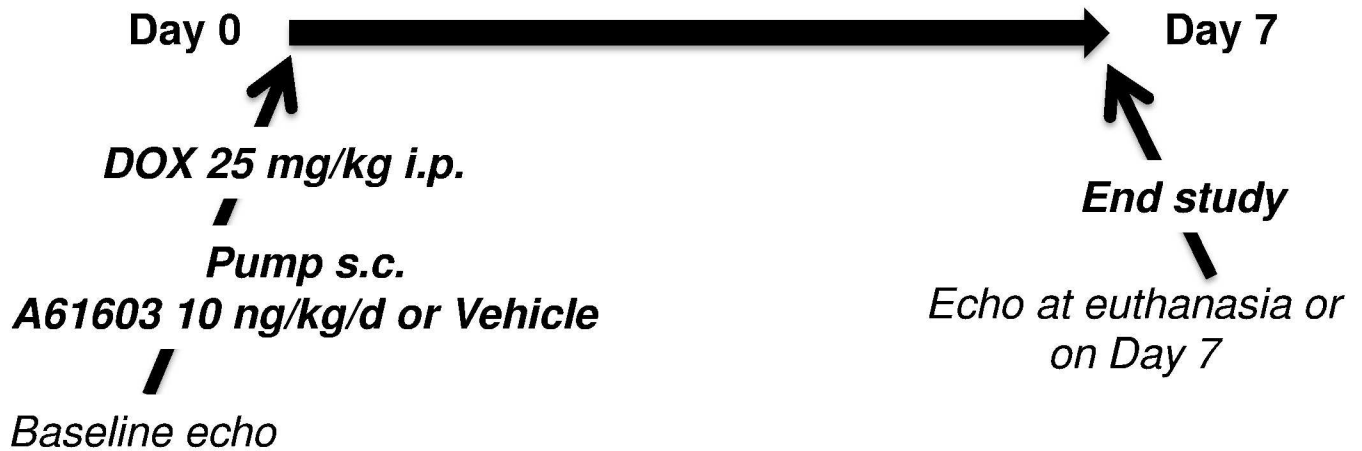

### B. A61603 improves survival after DOX in WT male mice, not in $\alpha$ 1A KO mice

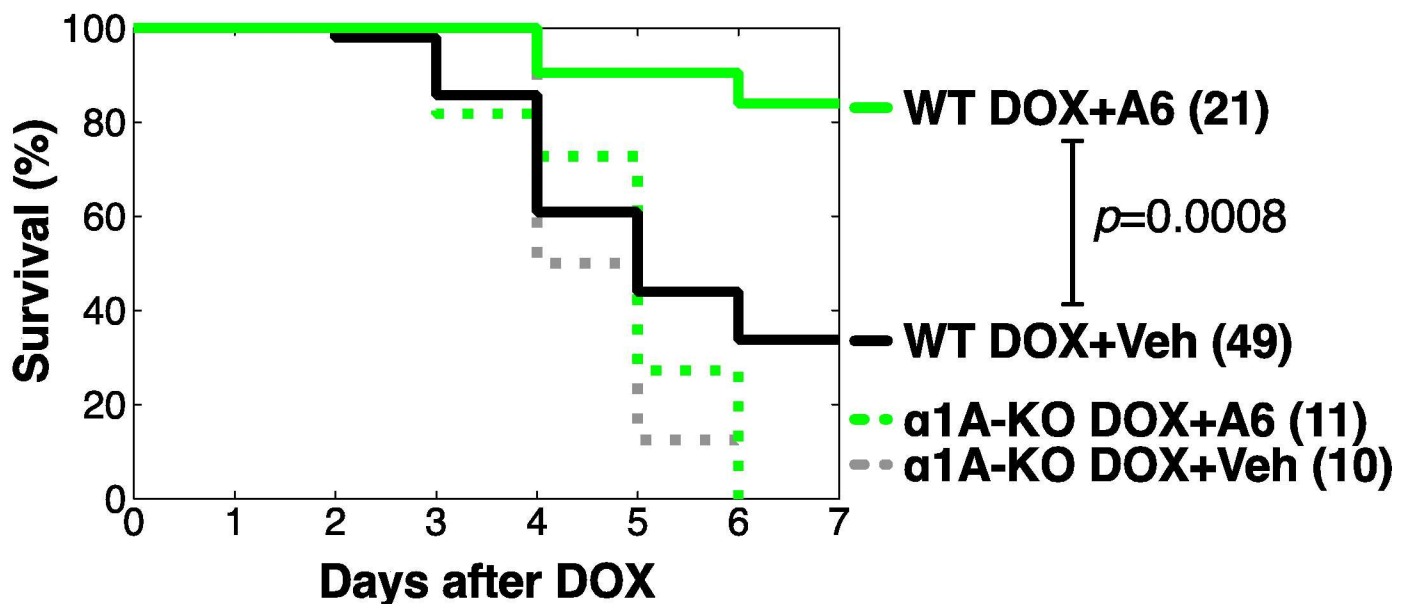

**Fig 4. Low-dose A61603 increases survival of WT male mice in a doxorubicin (DOX) cardiomyopathy model, but not in  $\alpha$ 1A-KO mice. (A)** Young male WT and  $\alpha$ 1A-KO mice were randomized to A61603 10 ng/kg/d (A6) or vehicle (100  $\mu$ M vitamin C, Veh) via s.c. osmotic mini-pump. Immediately after pump implantation, mice were injected with a single dose of DOX 25 mg/kg i.p. Mice were monitored daily, and euthanized for HF per protocol or on day 7. Echo was done prior to treatment in some mice, and on the day of sacrifice in surviving mice. Operators were blinded to genotype and treatment. **(B)** Kaplan-Meier 7-day survival curves, with numbers of mice indicated.

doi:10.1371/journal.pone.0168409.g004

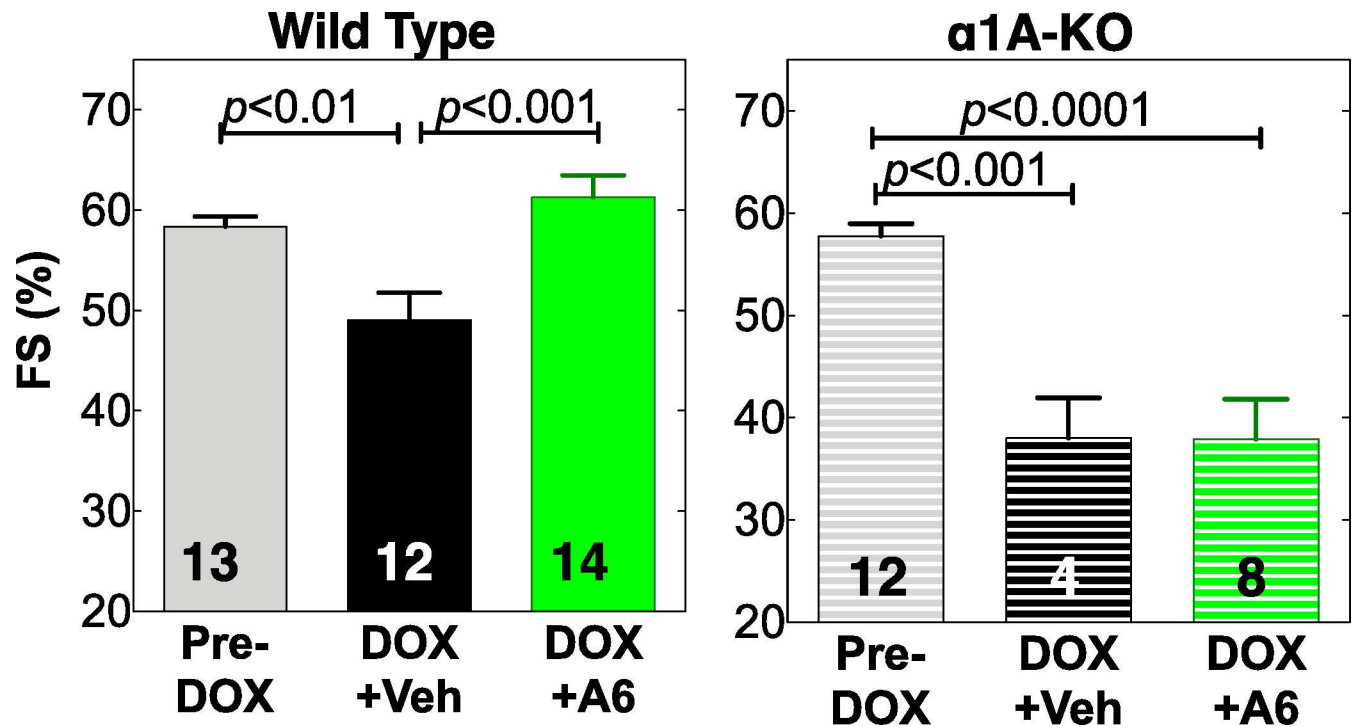

**Fig 5. A61603 preserves cardiac function after DOX in WT male mice, but not in α1A-KO mice.** Mice given DOX were treated with A61603 or Vehicle as in Fig 4. Values are fractional shortening (FS) by echo, mean ± SE, n = mice, p by one-way ANOVA with Newman-Keuls multiple comparisons test.

doi:10.1371/journal.pone.0168409.g005

caused by DOX drastically reduced CO in WT mice treated with vehicle by 73%, whereas the decrease in CO was only 41% in WT mice treated with A61603 ( $p < 0.01$  vs. vehicle). Again this protective effect of A61603 on CO was lost in the α1A KO (Table 2, Fig 6). Preservation of hemodynamics by A61603 was even more impressive when CO was normalized to body weight (BW), to derive a cardiac index (88% of Pre-DOX with A61603, 25% of Pre-DOX with vehicle,  $p < 0.0001$  A61603 vs. vehicle, Table 2). Overall, these data suggested that mortality after DOX was due to reduced cardiac function, and that A61603 improved survival by improving function, an effect that required the α1A receptor.

### A61603 prevents cardiac cell death and myocardial fibrosis in the acute DOX model

To identify potential cell mechanisms whereby A61603 preserved cardiac function and hemodynamics, we quantified indices of cardiac cell death and fibrosis in WT mice. DOX increased serum creatine kinase (CK) activity, an assay for myocyte necrosis, by 4-fold at euthanasia vs. no DOX, and A61603 prevented this increase ( $p < 0.001$  vs. vehicle) (Table 3, Fig 7). DOX increased LV nuclear TUNEL staining, an index of cardiac apoptosis, by 7-fold vs. no DOX, and A61603 prevented this increase ( $p < 0.05$  vs. vehicle) (Fig 7). DOX increased LV sirius red staining, a measure of myocardial fibrosis, by 1.4-fold, and A61603 prevented this increase ( $p < 0.0001$  vs. vehicle) (Fig 7). These data confirmed and extended our prior finding that A61603 in the DOX model reduced fibrosis and apoptosis detected by an MRI approach [9], and suggested that A61603 prevention of cardiac cell death and fibrosis could explain preservation of LV function and overall hemodynamics.

**Table 2. Echocardiography of male mice treated with DOX.**

|                  | WILD TYPE |               |             |         | Alpha-1A KO |              |              |        |
|------------------|-----------|---------------|-------------|---------|-------------|--------------|--------------|--------|
|                  | Pre-DOX   | Post-DOX      |             |         | Pre-DOX     | Post-DOX     |              |        |
|                  |           | Vehicle       | A61603      | A6/Veh  |             | Vehicle      | A61603       | A6/Veh |
| mice (n)         | 13        | 7             | 6           |         | 12          | 4            | 8            |        |
| FS (%)           | 58 ± 4    | 49 ± 3 (12)++ | 61 ± 2 (14) | 1.20*** | 58 ± 1      | 38 ± 4+++    | 38 ± 4+++    | 0.99   |
| LVIDd (mm)       | 3.1 ± 0.1 | 2.5 ± 0.1+++  | 2.7 ± 0.1++ | 1.08    | 3.0 ± 0.1   | 2.3 ± 0.3+   | 2.3 ± 0.2++  | 0.98   |
| LVIDs (mm)       | 1.3 ± 0.1 | 1.4 ± 0.1     | 1.3 ± 0.1   | 0.89    | 1.2 ± 0.1   | 1.4 ± 0.1    | 1.4 ± 0.2    | 1.01   |
| LVPWd (mm)       | 0.9 ± 0.0 | 1.0 ± 0.1     | 0.9 ± 0.1   | 0.92    | 0.9 ± 0.0   | 1.1 ± 0.1    | 1.1 ± 0.1    | 1.02   |
| LVPWs (mm)       | 1.6 ± 0.1 | 1.2 ± 0.1++   | 1.4 ± 0.1   | 1.15    | 1.5 ± 0.0   | 1.1 ± 0.1++  | 1.3 ± 0.1++  | 1.12   |
| IVSd (mm)        | 0.9 ± 0.1 | 1.00 ± 0.1    | 0.9 ± 0.1   | 0.95    | 0.9 ± 0.0   | 0.9 ± 0.1    | 1.0 ± 0.1    | 1.05   |
| IVSs (mm)        | 1.7 ± 0.1 | 1.4 ± 0.1     | 1.6 ± 0.1   | 1.11    | 1.7 ± 0.0   | 1.4 ± 0.2+   | 1.4 ± 0.1+   | 1.06   |
| SV (μV (±))      | 34 ± 1    | 17 ± 2+++     | 23 ± 3+++   | 1.37*   | 31 ± 2      | 15 ± 1++     | 14 ± 3+++    | 0.74   |
| HR (bpm)         | 663 ± 12  | 300 ± 79+++   | 513 ± 77+   | 1.71*   | 657 ± 11    | 252 ± 16+++  | 214 ± 47+++  | 0.85   |
| CO (ml/min)      | 22 ± 1    | 6 ± 2+++      | 13 ± 2+++   | 2.27**  | 20 ± 1      | 4 ± 2+++     | 3 ± 1+++     | 0.79   |
| CO/BW (ml/min/g) | 0.8 ± 0.0 | 0.2 ± 0.1+++  | 0.7 ± 0.1++ | 3.04*** | 0.8 ± 0.0   | 0.2 ± 0.1+++ | 0.1 ± 0.0+++ | 0.59   |

WT or alpha-1A-KO mice average age 16.5 weeks had DOX 25 mg/kg i.p., then were treated with A61603 10 ng/kg/d or Vehicle by mini-pump. 2D-guided M-mode echo was done Pre-DOX in some mice, and Post-DOX in all mice, either at euthanasia for HF or at 7 days.

Values are mean ± SE, with *n* (mice) given or in parentheses.

The *n* for Post-DOX FS is higher, since this was the only value recorded in an initial series of mice.

*p* by ANOVA with Newman-Keuls multiple comparisons test: A61603 vs. Vehicle

\*\*\* = <0.001

\*\* = <0.01

\* = <0.05

Post-DOX vs. Pre-DOX

+++ = <0.001

++ = <0.01

+ = <0.05.

Pre-DOX values for WT vs. alpha-1A-KO did not differ (*p*>0.1).

doi:10.1371/journal.pone.0168409.t002

### Effect of A61603 on body weight and heart weight in the acute DOX model

WT mice treated with DOX lost body weight (BW) over the study, and A61603 tended to reduce the weight loss (11% loss A61603 vs. 16% vehicle, *p* = 0.3), a trend that was not seen in α1A KO mice (Table 3). Similarly, combined right and left ventricular weight (VW), VW/BW, and VW normalized to tibia length (TL) trended higher with A61603, and this trend was absent in α1A KO mice (Table 3). VW in mice given DOX and treated with vehicle was significantly less than in a comparable group of 20 mice not given DOX (104 ± 6 mg, *n* = 6 vs. 127 ± 3, *n* = 20, *p*<0.05). However, there was no difference when VW was normalized to BW (4.6 ± 0.2, *n* = 6 DOX vs. 4.8 ± 0.1, *n* = 20 no DOX). Thus there was cardiac atrophy in proportion to the loss of BW.

### Female mice are less susceptible to acute DOX cardiotoxicity

To assess the clinical relevance to females of this acute DOX cardiomyopathy model, we studied a cohort of young female mice in the same model used for males (Fig 4A). We used DOX doses (mg/kg i.p.) of 15–20, 25–30, and 35–40. In the young females, no dose reduced survival or FS significantly; only the 35–40 mg/kg dose reduced BW, LVIDd, HR, and SV, and thereby



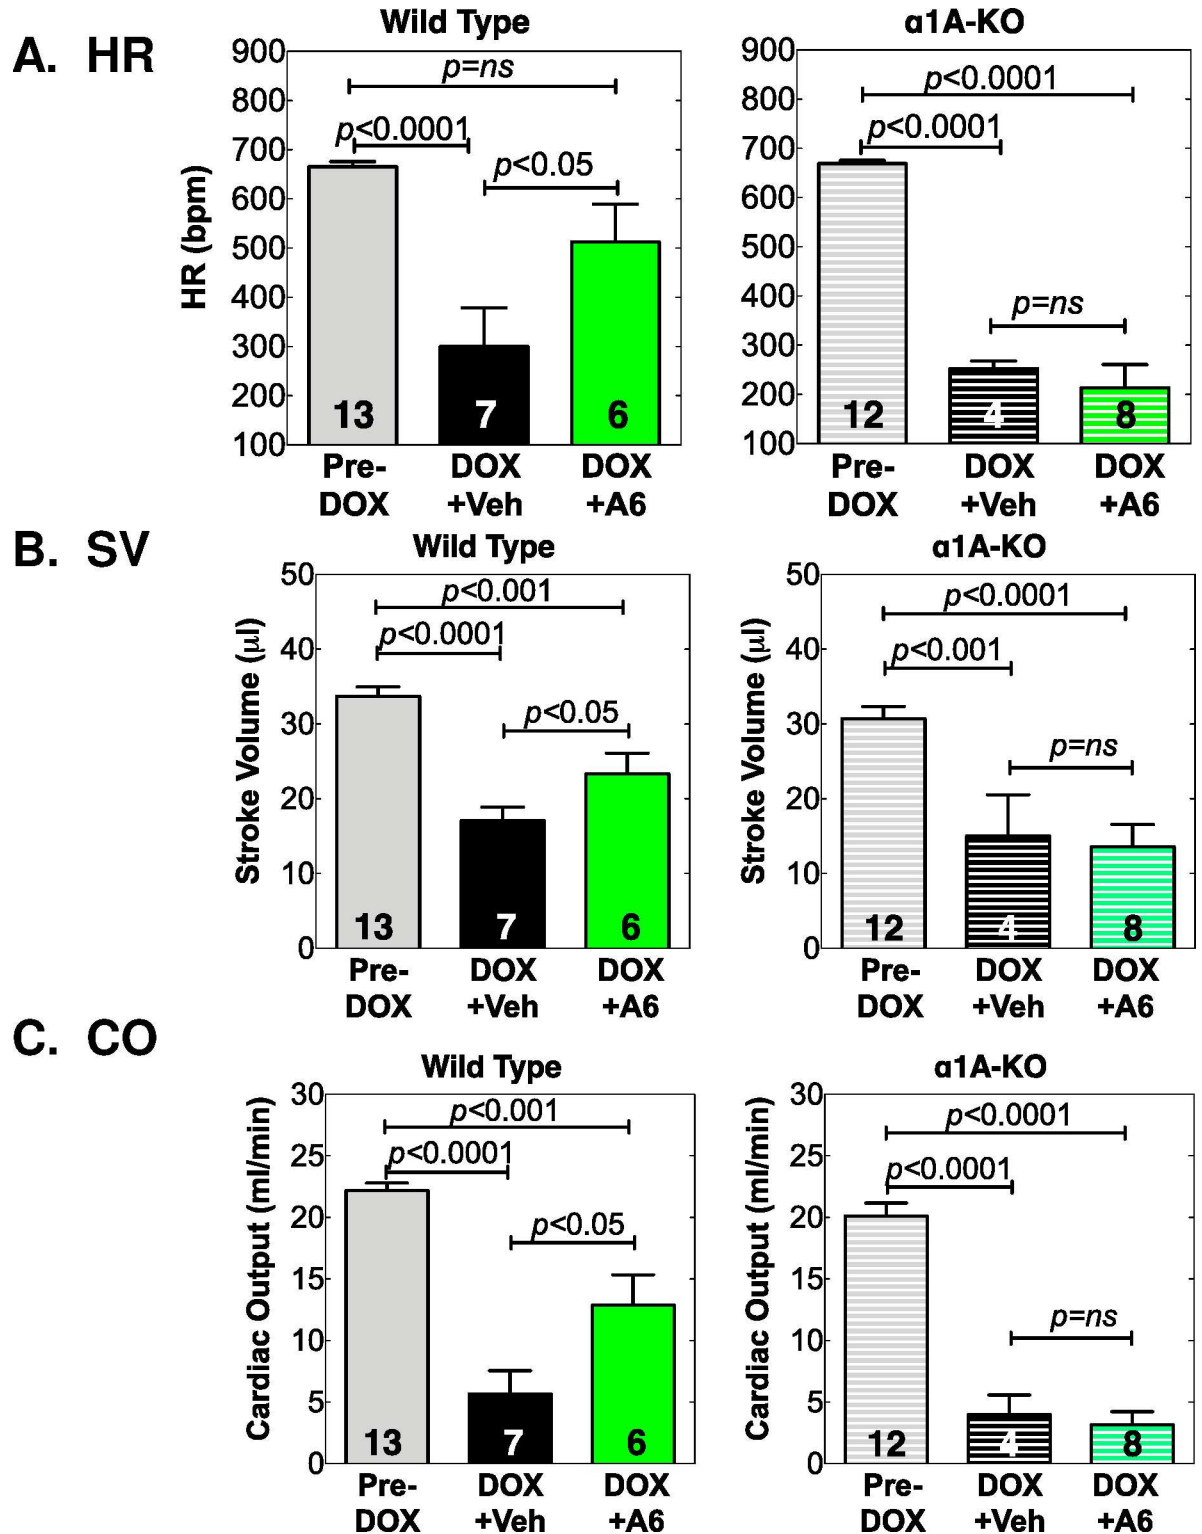

**Fig 6. A61603 preserves hemodynamics in male mice after DOX, via the  $\alpha$ 1A.** Mice given DOX were treated with A61603 or Vehicle as in Fig 4. Shown are (A) HR, (B) SV, and (C) CO, all from echo, for each treatment group and genotype. Values are mean  $\pm$  SE, n = mice, p by one-way ANOVA with Newman-Keuls multiple comparisons test.

doi:10.1371/journal.pone.0168409.g006

**Table 3. Pathology of male mice treated with DOX.**

|                           | Wild Type       |                 |         | Alpha-1A KO |            |            |
|---------------------------|-----------------|-----------------|---------|-------------|------------|------------|
|                           | Vehicle         | A61603          | A6/Veh  | Vehicle     | A61603     | A6/Veh (%) |
| mice (n)                  | 6               | 5               |         | 4           | 7          |            |
| BW Pre-DOX (g)            | 27.0 ± 0.7      | 26.2 ± 0.6      | 0.97    | 26.2 ± 0.5  | 26.3 ± 0.8 | 1.00       |
| BW Post-DOX (g)           | 22.7 ± 0.6      | 23.2 ± 0.5      | 1.02    | 22.0 ± 0.4  | 20.8 ± 0.5 | 0.95       |
| Change in BW (g)          | -4.3 ± 0.6      | -3.0 ± 0.8      | 0.70    | -4.2 ± 0.5  | -5.5 ± 0.4 | 1.31       |
| % Change in BW            | -16 ± 3         | -11 ± 3         | 0.72    | -16 ± 2     | -21 ± 1    | 1.30*      |
| VW (mg)                   | 104 ± 6         | 113 ± 9         | 1.09    | 103 ± 8     | 99 ± 5     | 0.97       |
| VW/BW                     | 4.6 ± 0.2       | 4.9 ± 0.3       | 1.06    | 4.7 ± 0.3   | 4.8 ± 0.2  | 1.03       |
| Tibia length (mm)         | 16.8 ± 0.1      | 17.5 ± 0.2      | 1.04*   | 17.5 ± 0.3  | 17.3 ± 0.2 | 0.99       |
| VW/TL                     | 6.2 ± 0.4       | 6.5 ± 0.5       | 1.04    | 5.8 ± 0.4   | 5.8 ± 0.3  | 0.98       |
| Serum CK (U/L)            | 1204 ± 98 (5)   | 571 ± 67 (5)    | 0.47*** | nd          | nd         |            |
| TUNEL (% positive nuclei) | 1.30 ± 0.22 (3) | 0.51 ± 0.11 (3) | 0.39*   | nd          | nd         |            |
| Fibrosis (% area)         | 32.1 ± 1.1 (3)  | 25.0 ± 0.6 (5)  | 0.78*** | nd          | nd         |            |

WT or alpha-1A-KO mice were treated as in Fig 1, with DOX 25 mg/kg/i.p., then A61603 10 ng/kg/d or vehicle, and pathology was done 7 days after DOX, or at euthanasia for HF.

Values are mean ± SE, with *n* (mice or hearts) given or in parentheses.

BW and VW are given only for mice that had measurements both Pre-DOX and Post-DOX.

*p* by Student's *t*-test; A61603 vs. Vehicle:

\*\*\* = <0.001

\* = <0.05. nd = not done.

doi:10.1371/journal.pone.0168409.t003

reduced CO and CI (Fig 8, Table 4). Overall, young female mice were resistant to DOX cardiotoxicity in comparison with young males, requiring a much higher dose (35–40 mg/kg) for a phenotype even approaching that in young males after DOX 25 mg/kg. The 35–40 mg/kg dose is roughly 105–120 mg/m<sup>2</sup>, or twice that of the human single-dose equivalent of 60 mg/m<sup>2</sup>. Therefore, this model does not mimic the increased susceptibility of human females to DOX [16,17], and we did not pursue additional studies of acute high-dose DOX in young female mice.

## Discussion

The major new finding of this study is that an α1A-AR selective agonist, the imidazoline A61603, can prevent anthracycline-induced cardiomyopathy in male mice. We found that A61603 was the most potent among 10 α1-agonists in activating myocyte ERK, and identified a low dose of A61603, 10 ng/kg/d, that activated cardiac ERK in vivo, without changing BP. Infusion of this low A61603 after a single DOX dose improved survival and preserved cardiac function and hemodynamics. These beneficial effects could be explained by A61603-mediated protection from cardiac cell death and fibrosis, and protection from death was reproduced in myocytes in vitro. The protective effects of A61603 required the α1A receptor in vitro and in vivo, and α1A KO mice had increased mortality and worse function and hemodynamics with DOX. Overall, these data provide support for the use of α1A-selective agonists as HF therapies.

Myocyte death is a fundamental cause of anthracycline cardiomyopathy [28], and multiple cellular mechanisms are responsible, including abnormalities in transcription factors, myofibrils, calcium regulation, mitochondria, extracellular matrix, and formation of reactive oxygen species [28,29,30]. As an example, we find that a different α1A agonist protects cardiac mitochondria and ATP levels [31].

## A. Necrosis and apoptosis

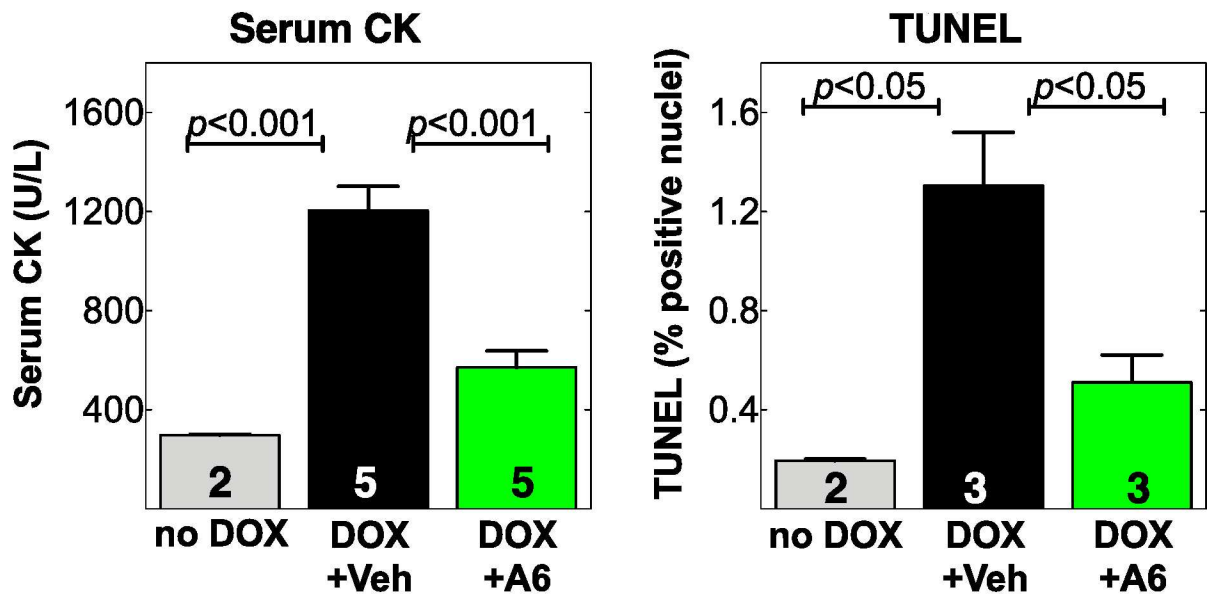

## B. Fibrosis

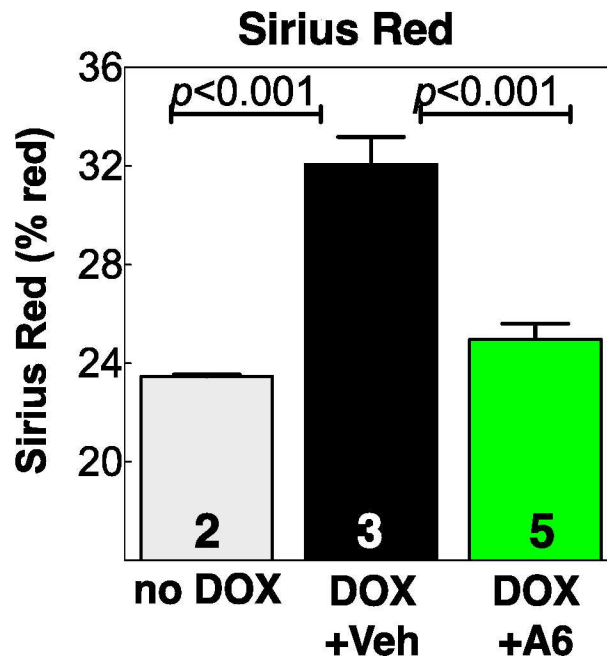

**Fig 7. A61603 prevents cardiac cell death and myocardial fibrosis after DOX in WT male mice.** Male mice were treated with DOX or saline injection, and randomized to A61803 or Vehicle, as in Fig 4. Shown are indices at end of study for (A) Cardiac myocyte necrosis measured by serum CK activity in blood collected by LV puncture, and TUNEL staining for apoptosis in LV sections; and (B) LV myocardial fibrosis by sirius red staining. Number (n) is hearts; *p* by one-way ANOVA with Newman-Keuls multiple comparisons test.

doi:10.1371/journal.pone.0168409.g007

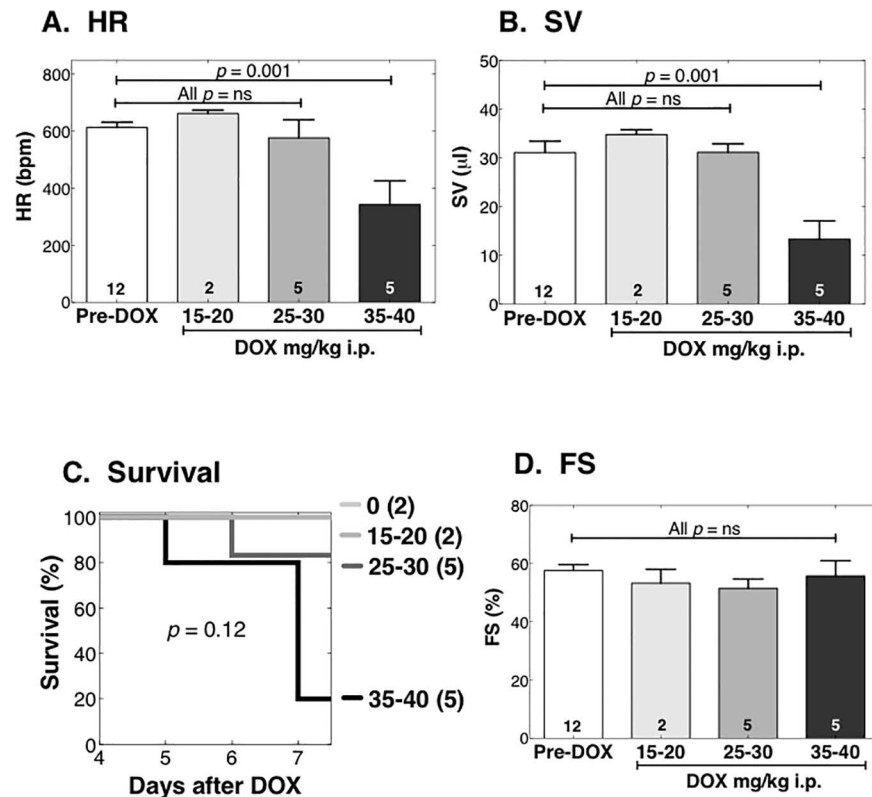

**Fig 8. Young female mice are resistant to DOX cardiac toxicity.** Female WT mice age 15 weeks were randomized to vehicle or a single dose of DOX 15–40 mg/kg i.p. Mice were monitored daily for 7 days, and euthanized for HF per protocol or on day 7. Echo was done prior to treatment, and on the day of sacrifice. Operators were blinded. The highest DOX dose reduced HR (A) and SV (B), and tended to reduce survival (C), but DOX did not change FS (D). *p* by one-way ANOVA with Newman-Keuls multiple comparisons test.

doi:10.1371/journal.pone.0168409.g008

The signaling mechanisms involved in  $\alpha$ 1A protection from myocyte death include ERK activation, which we found is required for adenoviral expression of the  $\alpha$ 1A to rescue  $\alpha$ 1A/B KO cardiomyocytes from DOX-induced death [8]. We show here that A61603 potently activates this  $\alpha$ 1A-ERK survival pathway in cultured myocytes and also protects adult myocytes from DOX-induced death via the  $\alpha$ 1A (Figs 1 and 2). We also show that A61603 activates ERK in the normal heart *In vivo* with an EC50 9 ng/kg/d (Fig 3), suggesting that dosing in the cardiomyopathy model, 10 ng/kg/d, is activating ERK in myocytes. ERK activation by A61603 in the injury model *in vivo* is difficult to test directly, since, whereas the  $\alpha$ 1A receptor is expressed in myocytes but not nonmyocytes [39], ERK is activated robustly in nonmyocytes in cardiac injury [32], obscuring direct effects in myocytes.

ERK is a central myocyte protective kinase [33], and several potential cardioprotective pathways downstream of  $\alpha$ 1-ARs and/or ERK are identified, such as PKC $\epsilon$ , p90 ribosomal S6 kinase, SOD, iNOS, anti-apoptotic Bcl proteins, adenosine, cyclooxygenase-2, GATA-4, and others [1,2,33]. Indeed, the ability of  $\alpha$ 1-ARs in general to activate pleiotropic signaling could explain their efficacy against multiple injuries, including oxygen radicals, ischemia-reperfusion, myocardial infarction, and pressure overload (review in [1,2,3]).

The current DOX model has limitations. The DOX dosing of 25 mg/kg in males is high, but was used in many prior studies [34,35,36,37,38], and is equivalent by allometric scaling to about 75 mg/m<sup>2</sup> in a mouse [39], only 25% higher than a typical single human dose of 60 mg/m<sup>2</sup>.

**Table 4. Echocardiography and pathology of WT female mice treated with DOX.**

|                  | Pre-DOX    | DOX dose (mg/kg i.p.) |            |              |
|------------------|------------|-----------------------|------------|--------------|
|                  |            | 15–20                 | 25–30      | 35–40        |
| mice (n)         | 12         | 2                     | 5          | 5            |
| FS (%)           | 58 ± 2     | 53 ± 5                | 52 ± 3     | 56 ± 5       |
| LVIDd (mm)       | 3.0 ± 0.1  | 3.2 ± 0.1             | 3.1 ± 0.1  | 2.1 ± 0.3+++ |
| LVIDs (mm)       | 1.3 ± 0.08 | 1.5 ± 0.2             | 1.5 ± 0.1  | 1.0 ± 0.2    |
| LVPWd (mm)       | 0.8 ± 0.06 | 0.9 ± 0.1             | 0.9 ± 0.1  | 1.2 ± 0.2+   |
| LVPWs (mm)       | 1.5 ± 0.05 | 1.5 ± 0.1             | 1.4 ± 0.1  | 1.6 ± 0.1    |
| IVSd (mm)        | 0.9 ± 0.04 | 0.8 ± 0.1             | 0.8 ± 0.1  | 1.1 ± 0.1    |
| IVSs (mm)        | 1.6 ± 0.06 | 1.6 ± 0.1             | 1.4 ± 0.1  | 1.6 ± 0.1    |
| SV (microl)      | 31 ± 2     | 35 ± 1                | 31 ± 2     | 13 ± 4+++    |
| HR (bpm)         | 613 ± 19   | 663 ± 12              | 577 ± 64   | 343 ± 83+++  |
| CO (ml/min)      | 19 ± 1     | 23 ± 0                | 18 ± 2     | 5 ± 3+++     |
| CO/BW (ml/min/g) | 0.9 ± 0.1  | 1.1 ± 0.0             | 0.8 ± 0.1  | 0.3 ± 0.1+++ |
| BW (g)           | 21.7 ± 0.3 | 21.1 ± 0.2            | 21.0 ± 1.1 | 17.1 ± 1.0++ |
| Change in BW (g) |            | -0.7 ± 0.2            | -0.7 ± 1.1 | -4.0 ± 1.0   |
| % Change in BW   |            | -3 ± 1                | -5 ± 6     | -24 ± 6      |
| VW (mg)          |            | 103 ± 3               | 105 ± 6    | 83 ± 6#      |
| VW/BW            |            | 4.9 ± 2.0             | 5.0 ± 0.4  | 4.7 ± 0.1    |
| TL (mm)          |            | 17.0 ± 0.2            | 17.3 ± 0.2 | 17.3 ± 0.2   |
| VW/TL            |            | 6.1 ± 2.0             | 6.1 ± 0.4  | 4.8 ± 0.3    |

WT female mice had baseline echo, then were treated with varying doses of DOX.

Mouse dosing was as follows (mg/kg i.p.): 15–20 (1 mouse 15, 1 mouse 20), 25–30 (3 mice 25, 2 mice 30), 35–40 (4 mice 35, 1 mouse 40).

Echo was repeated at euthanasia for distress or bradycardia or at 7 days, and pathology was done.

Values are mean ± SE, with *n* (mice) given.

*p* by ANOVA with Newman-Keuls multiple comparisons test: DOX dose vs. Pre-DOX

+++ = <0.001

++ = <0.01

+ = <0.05.

high DOX vs. low or medium DOX:

# = <0.05

doi:10.1371/journal.pone.0168409.t004

However, mortality is high in this model, most likely from the severe reductions in heart rate and stroke volume, producing a 75% decrease in cardiac index in vehicle-treated mice, vs. only 12% decrease with A61603 (Table 2). Humans do not typically have reduced heart rate in HF. Also unlike humans, where females are more susceptible to anthracyclines [16,17], female mice were resistant relative to males, as in other heart disease models [40]. We studied only young mice (14–18 weeks), equivalent to approximately 25 human years, and effects in aged males and females are unknown. DOX caused weight loss, which was reduced but not prevented by A61603 (Table 3), consistent with poor feeding from low cardiac index and/or systemic toxicity, such as liver or bone marrow damage [41,42,43,44], which can also be seen in humans. Alternative chronic dosing models might better simulate cardiac toxicity with less systemic toxicity [45]. Overall, this high dose model might be more relevant for the acute DOX toxicity observed in about 10–30% of patients [46,47,48].

These limitations notwithstanding, the data do show clearly that a small molecule α1A agonist can prevent cardiac injury and improve cardiac function and hemodynamics, at a very low dose that does not change BP. Besides this report, several lines of evidence support the



translation of  $\alpha$ 1A-agonist cardioprotection to human HF.  $\alpha$ 1-ARs levels and regulation are similar in mouse and human heart [4], and A61603 activates protective ERK signaling in human LV myocardium ex vivo [11]. Although  $\alpha$ 1-AR levels represent roughly 10% of the AR population in non-diseased hearts, with  $\beta$ -ARs at 90%,  $\beta$ -AR down-regulation in HF increases the proportion of  $\alpha$ 1-ARs to nearly 25% [2,4,49]. In addition, as  $\beta$ -AR function deteriorates in HF,  $\alpha$ 1-mediated inotropy can become similar to  $\beta$ -AR [50]. Antagonism of  $\alpha$ 1-AR signaling with nonselective  $\alpha$ 1-blockers can cause HF and death, as shown in the ALLHAT and V-HeFT trials [51,52]. Altogether, these studies provide indirect human proof of concept for  $\alpha$ 1A agonist therapy.

Potential concerns regarding  $\alpha$ 1A-agonist therapy exist, and the main arguments have been reviewed [1]. One concern would be increased BP. However, the benefit of A61603 is seen at 10 ng/kg per day, dosing that does not change BP (Fig 3), and is far below the EC50 of 300 ng/kg for increasing BP with IV bolus dosing [15]. Thus an ample therapeutic window exists for cardioselective dosing.

As a note of caution, several other potential drugs are reportedly cardioprotective in anthracycline cardiotoxicity models, such as thrombopoietin [25], erythropoietin [53], melatonin [36], CB1 cannabinoid receptor antagonists [54], granulocyte colony-stimulating factor [55], and ErbB2 [56], so that proof of concept in other forms of cardiomyopathy will be required to advance the concept of an  $\alpha$ 1A agonist as a drug to treat HF.

## Conclusions

In conclusion, the  $\alpha$ 1A-AR selective agonist A61603, at a very low subpressor dose, prevents cardiomyopathy induced by an anthracycline in male mice. Protection in males requires the  $\alpha$ 1A receptor and involves ERK activation and prevention of cardiomyocyte death. The model is less useful in female mice. These findings confirm and extend previous observations of cardioprotection by  $\alpha$ 1A-agonist therapy, and support the developing model of  $\alpha$ 1A agonists as novel therapies for HF.

## Author Contributions

**Conceptualization:** MDM TC RD PCS.

**Formal analysis:** MDM TC PS RD PCS.

**Funding acquisition:** PCS.

**Investigation:** MDM TC PS BM RD.

**Methodology:** MDM TC PS BM RD PCS.

**Project administration:** PCS.

**Resources:** PCS.

**Supervision:** PCS.

**Validation:** MDM TC PS RD PCS.

**Visualization:** MDM PCS.

**Writing – original draft:** MDM PCS.

**Writing – review & editing:** MDM TC PS PCS.

## References

1. Jensen BC, O'Connell TD, Simpson PC (2011) Alpha-1-adrenergic receptors: Targets for agonist drugs to treat heart failure. *J Mol Cell Cardiol* 51: 518–528. doi: [10.1016/j.yjmcc.2010.11.014](https://doi.org/10.1016/j.yjmcc.2010.11.014) PMID: [21118696](https://pubmed.ncbi.nlm.nih.gov/21118696/)
2. O'Connell TD, Jensen BC, Baker AJ, Simpson PC (2014) Cardiac alpha1-adrenergic receptors: novel aspects of expression, signaling mechanisms, physiologic function, and clinical importance. *Pharmacol Rev* 66: 308–333. doi: [10.1124/pr.112.007203](https://doi.org/10.1124/pr.112.007203) PMID: [24368739](https://pubmed.ncbi.nlm.nih.gov/24368739/)
3. Jensen BC, O'Connell TD, Simpson PC (2014) Alpha-1-adrenergic receptors in heart failure: the adaptive arm of the cardiac response to chronic catecholamine stimulation. *J Cardiovasc Pharmacol* 63: 291–301. doi: [10.1097/FJC.0000000000000032](https://doi.org/10.1097/FJC.0000000000000032) PMID: [24145181](https://pubmed.ncbi.nlm.nih.gov/24145181/)
4. Jensen BC, Swigart PM, De Marco T, Hoopes C, Simpson PC (2009) {alpha}1-Adrenergic receptor subtypes in nonfailing and failing human myocardium. *Circ Heart Fail* 2: 654–663. doi: [10.1161/CIRCHEARTFAILURE.108.846212](https://doi.org/10.1161/CIRCHEARTFAILURE.108.846212) PMID: [19919991](https://pubmed.ncbi.nlm.nih.gov/19919991/)
5. Lin F, Owens WA, Chen S, Stevens ME, Kesteven S, Arthur JF, et al. (2001) Targeted alpha(1A)-adrenergic receptor overexpression induces enhanced cardiac contractility but not hypertrophy. *Circ Res* 89: 343–350. PMID: [11509451](https://pubmed.ncbi.nlm.nih.gov/11509451/)
6. Du XJ, Fang L, Gao XM, Kiriazis H, Feng X, Hotchkin E, et al. (2004) Genetic enhancement of ventricular contractility protects against pressure-overload-induced cardiac dysfunction. *J Mol Cell Cardiol* 37: 979–987. doi: [10.1016/j.yjmcc.2004.07.010](https://doi.org/10.1016/j.yjmcc.2004.07.010) PMID: [15522275](https://pubmed.ncbi.nlm.nih.gov/15522275/)
7. Du XJ, Gao XM, Kiriazis H, Moore XL, Ming Z, Su Y, et al. (2006) Transgenic alpha1A-adrenergic activation limits post-infarct ventricular remodeling and dysfunction and improves survival. *Cardiovasc Res* 71: 735–743. doi: [10.1016/j.cardiores.2006.06.015](https://doi.org/10.1016/j.cardiores.2006.06.015) PMID: [16859660](https://pubmed.ncbi.nlm.nih.gov/16859660/)
8. Huang Y, Wright CD, Merkwand CL, Baye NL, Liang Q, Simpson PC, et al. (2007) An alpha1A-adrenergic-extracellular signal-regulated kinase survival signaling pathway in cardiac myocytes. *Circulation* 115: 763–772. doi: [10.1161/CIRCULATIONAHA.106.664862](https://doi.org/10.1161/CIRCULATIONAHA.106.664862) PMID: [17283256](https://pubmed.ncbi.nlm.nih.gov/17283256/)
9. Dash R, Chung J, Chan T, Yamada M, Barral J, Nishimura D, et al. (2011) A molecular MRI probe to detect treatment of cardiac apoptosis in vivo. *Magn Reson Med* 66: 1152–1162. doi: [10.1002/mrm.22876](https://doi.org/10.1002/mrm.22876) PMID: [21360750](https://pubmed.ncbi.nlm.nih.gov/21360750/)
10. Cowley PM, Wang G, Chang AN, Makwana O, Swigart PM, Lovett DH, et al. (2015) The alpha1A-adrenergic receptor subtype mediates increased contraction of failing right ventricular myocardium. *Am J Physiol Heart Circ Physiol* 309: H888–896. doi: [10.1152/ajpheart.00042.2015](https://doi.org/10.1152/ajpheart.00042.2015) PMID: [26116709](https://pubmed.ncbi.nlm.nih.gov/26116709/)
11. Thomas RC Jr, Singh A, Cowley PM, Myagmar B-E, Montgomery MD, Swigart PM, et al. (2016) A myocardial slice culture model reveals alpha-1A-adrenergic receptor signaling in the human heart. *JACC Basic Transl Res* 1: 155–167.
12. Altenbach RJ, Khilevich A, Kolasa T, Rohde JJ, Bhatia PA, Patel MV, et al. (2004) Synthesis and structure-activity studies on N-[5-(1H-imidazol-4-yl)-5,6,7,8-tetrahydro-1-naphthalenyl]methanesulfonamide, an imidazole-containing alpha(1A)-adrenoceptor agonist. *J Med Chem* 47: 3220–3235. doi: [10.1021/jm030551a](https://doi.org/10.1021/jm030551a) PMID: [15163201](https://pubmed.ncbi.nlm.nih.gov/15163201/)
13. Jensen BC, Swigart PM, Laden ME, DeMarco T, Hoopes C, Simpson PC (2009) The alpha-1D is the predominant alpha-1-adrenergic receptor subtype in human epicardial coronary arteries. *J Am Coll Cardiol* 54: 1137–1145. doi: [10.1016/j.jacc.2009.05.056](https://doi.org/10.1016/j.jacc.2009.05.056) PMID: [19761933](https://pubmed.ncbi.nlm.nih.gov/19761933/)
14. Ky B, Vejpongsap P, Yeh ET, Force T, Moslehi JJ (2013) Emerging paradigms in cardiomyopathies associated with cancer therapies. *Circ Res* 113: 754–764. doi: [10.1161/CIRCRESAHA.113.300218](https://doi.org/10.1161/CIRCRESAHA.113.300218) PMID: [23989717](https://pubmed.ncbi.nlm.nih.gov/23989717/)
15. Rokosh DG, Simpson PC (2002) Knockout of the alpha 1A/C-adrenergic receptor subtype: the alpha 1A/C is expressed in resistance arteries and is required to maintain arterial blood pressure. *Proc Natl Acad Sci U S A* 99: 9474–9479. doi: [10.1073/pnas.132552699](https://doi.org/10.1073/pnas.132552699) PMID: [12093905](https://pubmed.ncbi.nlm.nih.gov/12093905/)
16. Silber JH, Jakacki RI, Larsen RL, Goldwein JW, Barber G (1993) Increased risk of cardiac dysfunction after anthracyclines in girls. *Med Pediatr Oncol* 21: 477–479. PMID: [8341214](https://pubmed.ncbi.nlm.nih.gov/8341214/)
17. Cardinale D, Colombo A, Bacchiani G, Tedeschi I, Meroni CA, Veglia F, et al. (2015) Early detection of anthracycline cardiotoxicity and improvement with heart failure therapy. *Circulation* 131: 1981–1988. doi: [10.1161/CIRCULATIONAHA.114.013777](https://doi.org/10.1161/CIRCULATIONAHA.114.013777) PMID: [25948538](https://pubmed.ncbi.nlm.nih.gov/25948538/)
18. Simpson P (1985) Stimulation of hypertrophy of cultured neonatal rat heart cells through an alpha 1-adrenergic receptor and induction of beating through an alpha 1- and beta 1-adrenergic receptor interaction. Evidence for independent regulation of growth and beating. *Circ Res* 56: 884–894. PMID: [2988814](https://pubmed.ncbi.nlm.nih.gov/2988814/)
19. Deng XF, Rokosh DG, Simpson PC (2000) Autonomous and growth factor-induced hypertrophy in cultured neonatal mouse cardiac myocytes. Comparison with rat. *Circ Res* 87: 781–788. PMID: [11055982](https://pubmed.ncbi.nlm.nih.gov/11055982/)

20. O'Connell TD, Rodrigo MC, Simpson PC (2006) Isolation and culture of adult mouse cardiac myocytes. *Methods Mol Biol* 357: Cardiovascular Proteomics: Methods and Protocols: 271–296.
21. Ishizaka S, Sievers RE, Zhu BQ, Rodrigo MC, Joho S, Foster E, et al. (2004) New technique for measurement of left ventricular pressure in conscious mice. *Am J Physiol Heart Circ Physiol* 286: H1208–1215. doi: [10.1152/ajpheart.00011.2003](https://doi.org/10.1152/ajpheart.00011.2003) PMID: [14563661](https://pubmed.ncbi.nlm.nih.gov/14563661/)
22. Shindler D (2015) E-chocardiography Journal: An Electronic Journal of Cardiac Ultrasound. <http://rwjms1umdnjedu/shindler/echohtml>.
23. Ahlquist RP (1948) A study of the adrenotropic receptors. *Am J Physiol* 153: 586–600. PMID: [18882199](https://pubmed.ncbi.nlm.nih.gov/18882199/)
24. Robert J (2007) Long-term and short-term models for studying anthracycline cardiotoxicity and protectors. *Cardiovasc Toxicol* 7: 135–139. doi: [10.1007/s12012-007-0022-4](https://doi.org/10.1007/s12012-007-0022-4) PMID: [17652818](https://pubmed.ncbi.nlm.nih.gov/17652818/)
25. Li K, Sung RY, Huang WZ, Yang M, Pong NH, Lee SM, et al. (2006) Thrombopoietin protects against in vitro and in vivo cardiotoxicity induced by doxorubicin. *Circulation* 113: 2211–2220. doi: [10.1161/CIRCULATIONAHA.105.560250](https://doi.org/10.1161/CIRCULATIONAHA.105.560250) PMID: [16651473](https://pubmed.ncbi.nlm.nih.gov/16651473/)
26. Chen YL, Chung SY, Chai HT, Chen CH, Liu CF, Huang TH, et al. (2015) Early Administration of Carvedilol Protected against Doxorubicin-Induced Cardiomyopathy. *J Pharmacol Exp Ther* 355: 516–527. doi: [10.1124/jpet.115.225375](https://doi.org/10.1124/jpet.115.225375) PMID: [26511374](https://pubmed.ncbi.nlm.nih.gov/26511374/)
27. Neilan TG, Coelho-Filho OR, Pena-Herrera D, Shah RV, Jerosch-Herold M, Francis SA, et al. (2012) Left ventricular mass in patients with a cardiomyopathy after treatment with anthracyclines. *Am J Cardiol* 110: 1679–1686. doi: [10.1016/j.amjcard.2012.07.040](https://doi.org/10.1016/j.amjcard.2012.07.040) PMID: [22917553](https://pubmed.ncbi.nlm.nih.gov/22917553/)
28. Sawyer DB, Peng X, Chen B, Pentassuglia L, Lim CC (2010) Mechanisms of anthracycline cardiac injury: can we identify strategies for cardioprotection? *Progress in Cardiovascular Diseases* 53: 105–113. doi: [10.1016/j.pcad.2010.06.007](https://doi.org/10.1016/j.pcad.2010.06.007) PMID: [20728697](https://pubmed.ncbi.nlm.nih.gov/20728697/)
29. Gianni L, Herman EH, Lipshultz SE, Minotti G, Sarvazyan N, Sawyer DB (2008) Anthracycline cardiotoxicity: from bench to bedside. *J Clin Oncol* 26: 3777–3784. doi: [10.1200/JCO.2007.14.9401](https://doi.org/10.1200/JCO.2007.14.9401) PMID: [18669466](https://pubmed.ncbi.nlm.nih.gov/18669466/)
30. Sterba M, Popelova O, Lenco J, Fucikova A, Brcakova E, Mazurova Y, et al. (2011) Proteomic insights into chronic anthracycline cardiotoxicity. *J Mol Cell Cardiol* 50: 849–862. doi: [10.1016/j.yjmcc.2011.01.018](https://doi.org/10.1016/j.yjmcc.2011.01.018) PMID: [21284945](https://pubmed.ncbi.nlm.nih.gov/21284945/)
31. Beak JY, Huang W, Parker JS, Patterson C, Simpson PC, Ma A, et al. (2016) An oral selective alpha-1A adrenergic receptor agonist prevents doxorubicin cardiotoxicity. *JACC Basic Transl Res* (in revision).
32. Yeh CC, Li H, Malhotra D, Turcato S, Nicholas S, Tu R, et al. (2010) Distinctive ERK and p38 signaling in remote and infarcted myocardium during post-MI remodeling in the mouse. *J Cell Biochem* 109: 1185–1191. doi: [10.1002/jcb.22498](https://doi.org/10.1002/jcb.22498) PMID: [20186881](https://pubmed.ncbi.nlm.nih.gov/20186881/)
33. Bueno OF, Molkentin JD (2002) Involvement of extracellular signal-regulated kinases 1/2 in cardiac hypertrophy and cell death. *Circ Res* 91: 776–781. PMID: [12411391](https://pubmed.ncbi.nlm.nih.gov/12411391/)
34. Bai P, Mabley JG, Liaudet L, Virag L, Szabo C, Pacher P (2004) Matrix metalloproteinase activation is an early event in doxorubicin-induced cardiotoxicity. *Oncology Reports* 11: 505–508. PMID: [14719091](https://pubmed.ncbi.nlm.nih.gov/14719091/)
35. Li S, Wang W, Niu T, Wang H, Li B, Shao L, et al. (2014) Nrf2 deficiency exaggerates doxorubicin-induced cardiotoxicity and cardiac dysfunction. *Oxid Med Cell Longev* 2014: 748524. doi: [10.1155/2014/748524](https://doi.org/10.1155/2014/748524) PMID: [24895528](https://pubmed.ncbi.nlm.nih.gov/24895528/)
36. Liu X, Chen Z, Chua CC, Ma YS, Youngberg GA, Hamdy R, et al. (2002) Melatonin as an effective protector against doxorubicin-induced cardiotoxicity. *Am J Physiol Heart Circ Physiol* 283: H254–263. doi: [10.1152/ajpheart.01023.2001](https://doi.org/10.1152/ajpheart.01023.2001) PMID: [12063298](https://pubmed.ncbi.nlm.nih.gov/12063298/)
37. Pacher P, Liaudet L, Bai P, Mabley JG, Kaminski PM, Virag L, et al. (2003) Potent metalloporphyrin peroxynitrite decomposition catalyst protects against the development of doxorubicin-induced cardiac dysfunction. *Circulation* 107: 896–904. PMID: [12591762](https://pubmed.ncbi.nlm.nih.gov/12591762/)
38. Pacher P, Liaudet L, Bai P, Virag L, Mabley JG, Hasko G, et al. (2002) Activation of poly(ADP-ribose) polymerase contributes to development of doxorubicin-induced heart failure. *J Pharmacol Exp Ther* 300: 862–867. PMID: [11861791](https://pubmed.ncbi.nlm.nih.gov/11861791/)
39. Food and Drug Administration US (2005) Guidance for Industry: Estimating the Maximum Safe Starting Dose in Initial Clinical Trials for Therapeutics in Adult Healthy Volunteers. July: page 7.
40. Blenck CL, Harvey PA, Reckelhoff JF, Leinwand LA (2016) The importance of biological sex and estrogen in rodent models of cardiovascular health and disease. *Circ Res* 118: 1294–1312. doi: [10.1161/CIRCRESAHA.116.307509](https://doi.org/10.1161/CIRCRESAHA.116.307509) PMID: [27081111](https://pubmed.ncbi.nlm.nih.gov/27081111/)
41. Danesi R, Fogli S, Gennari A, Conte P, Del Tacca M (2002) Pharmacokinetic-pharmacodynamic relationships of the anthracycline anticancer drugs. *Clin Pharmacokinet* 41: 431–444. doi: [10.2165/00003088-200241060-00004](https://doi.org/10.2165/00003088-200241060-00004) PMID: [12074691](https://pubmed.ncbi.nlm.nih.gov/12074691/)

42. Bagchi D, Bagchi M, Hassoun EA, Kelly J, Stohs SJ (1995) Adriamycin-induced hepatic and myocardial lipid peroxidation and DNA damage, and enhanced excretion of urinary lipid metabolites in rats. *Toxicology* 95: 1–9. PMID: [7825176](#)
43. Kalender Y, Yel M, Kalender S (2005) Doxorubicin hepatotoxicity and hepatic free radical metabolism in rats. The effects of vitamin E and catechin. *Toxicology* 209: 39–45. doi: [10.1016/j.tox.2004.12.003](#) PMID: [15725512](#)
44. Zhao X, Zhang J, Tong N, Chen Y, Luo Y (2012) Protective effects of berberine on doxorubicin-induced hepatotoxicity in mice. *Biol Pharm Bull* 35: 796–800. PMID: [22687420](#)
45. Li DL, Wang ZV, Ding G, Tan W, Luo X, Criollo A, et al. (2016) Doxorubicin blocks cardiomyocyte autophagic flux by inhibiting lysosome acidification. *Circulation* 133: 1668–1687. doi: [10.1161/CIRCULATIONAHA.115.017443](#) PMID: [26984939](#)
46. Cardinale D, Sandri MT, Martinoni A, Tricca A, Civelli M, Lamantia G, et al. (2000) Left ventricular dysfunction predicted by early troponin I release after high-dose chemotherapy. *J Amer Coll Cardiol* 36: 517–522.
47. Luminari S, Montanini A, Caballero D, Bologna S, Notter M, Dyer MJ, et al. (2010) Nonpegylated liposomal doxorubicin (Myocet<sup>TM</sup>) combination (R-COMP) chemotherapy in elderly patients with diffuse large B-cell lymphoma (DLBCL): results from the phase II EURO18 trial. *Ann Oncol* 21: 1492–1499. doi: [10.1093/annonc/mdp544](#) PMID: [20007997](#)
48. Tirelli U, Errante D, Van Glabbeke M, Teodorovic I, Kluin-Nelemans JC, Thomas J, et al. (1998) CHOP is the standard regimen in patients > or = 70 years of age with intermediate-grade and high-grade non-Hodgkin's lymphoma: results of a randomized study of the European Organization for Research and Treatment of Cancer Lymphoma Cooperative Study Group. *J Clin Oncol* 16: 27–34. doi: [10.1200/jco.1998.16.1.27](#) PMID: [9440719](#)
49. Baker AJ (2014) Adrenergic signaling in heart failure: a balance of toxic and protective effects. *Pflugers Arch* 466: 1139–1150. doi: [10.1007/s00424-014-1491-5](#) PMID: [24623099](#)
50. Skomedal T, Borthne K, Aass H, Geiran O, Osnes JB (1997) Comparison between alpha-1 adrenoceptor-mediated and beta adrenoceptor-mediated inotropic components elicited by norepinephrine in failing human ventricular muscle. *J Pharmacol Exp Ther* 280: 721–729. PMID: [9023284](#)
51. ALLHAT CRG (2000) Major cardiovascular events in hypertensive patients randomized to doxazosin vs chlorthalidone: the antihypertensive and lipid-lowering treatment to prevent heart attack trial (ALLHAT). [see comments]. *Jama* 283: 1967–1975. PMID: [10789664](#)
52. Cohn JN (1993) The Vasodilator-Heart Failure Trials (V-HeFT). Mechanistic data from the VA Cooperative Studies. Introduction. *Circulation* 87: VI1–4.
53. Li L, Takemura G, Li Y, Miyata S, Esaki M, Okada H, et al. (2006) Preventive effect of erythropoietin on cardiac dysfunction in doxorubicin-induced cardiomyopathy. *Circulation* 113: 535–543. doi: [10.1161/CIRCULATIONAHA.105.568402](#) PMID: [16449733](#)
54. Mukhopadhyay P, Batkai S, Rajesh M, Czifra N, Harvey-White J, Hasko G, et al. (2007) Pharmacological inhibition of CB1 cannabinoid receptor protects against doxorubicin-induced cardiotoxicity. *J Am Coll Cardiol* 50: 528–536. doi: [10.1016/j.jacc.2007.03.057](#) PMID: [17678736](#)
55. Li L, Takemura G, Li Y, Miyata S, Esaki M, Okada H, et al. (2007) Granulocyte colony-stimulating factor improves left ventricular function of doxorubicin-induced cardiomyopathy. *Lab Invest* 87: 440–455. doi: [10.1038/labinvest.3700530](#) PMID: [17334414](#)
56. Belmonte F, Das S, Sysa-Shah P, Sivakumaran V, Stanley B, Guo X, et al. (2015) ErbB2 overexpression upregulates antioxidant enzymes, reduces basal levels of reactive oxygen species, and protects against doxorubicin cardiotoxicity. *Am J Physiol Heart Circ Physiol* 309: H1271–1280. doi: [10.1152/ajpheart.00517.2014](#) PMID: [26254336](#)
